# Supplementary material for: Light Sheet Microscopy and 3D Analysis of Human iPSC-derived Embryoid Bodies
Source: Preprints.org preprint supplement (doi:10.20944/preprints202301.0238.v1), 2023-01-13
Supplement: Supplementary file 1 [file supplementary]

# Supplementary figure 1

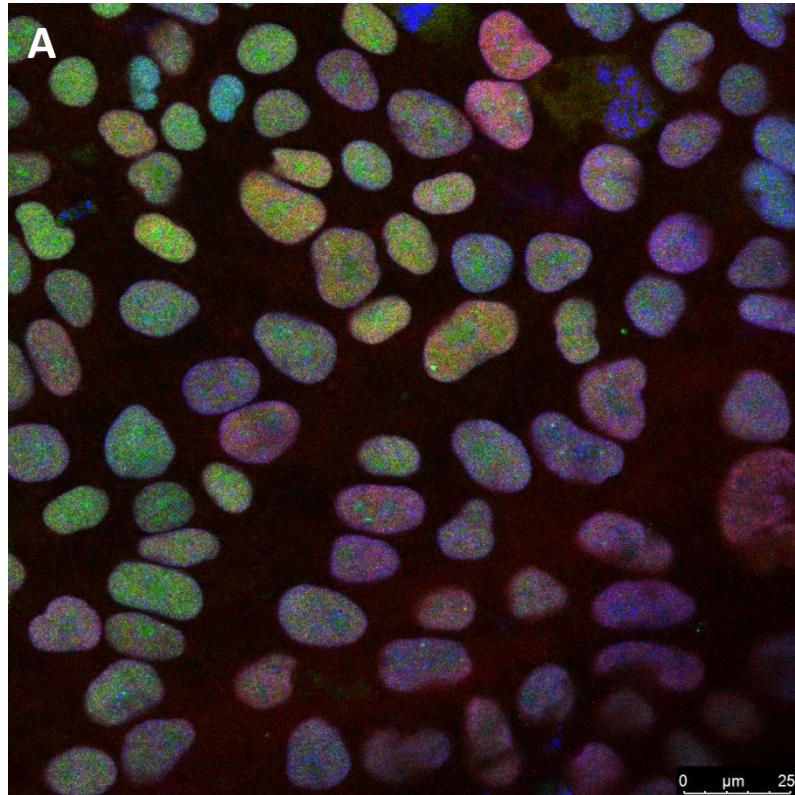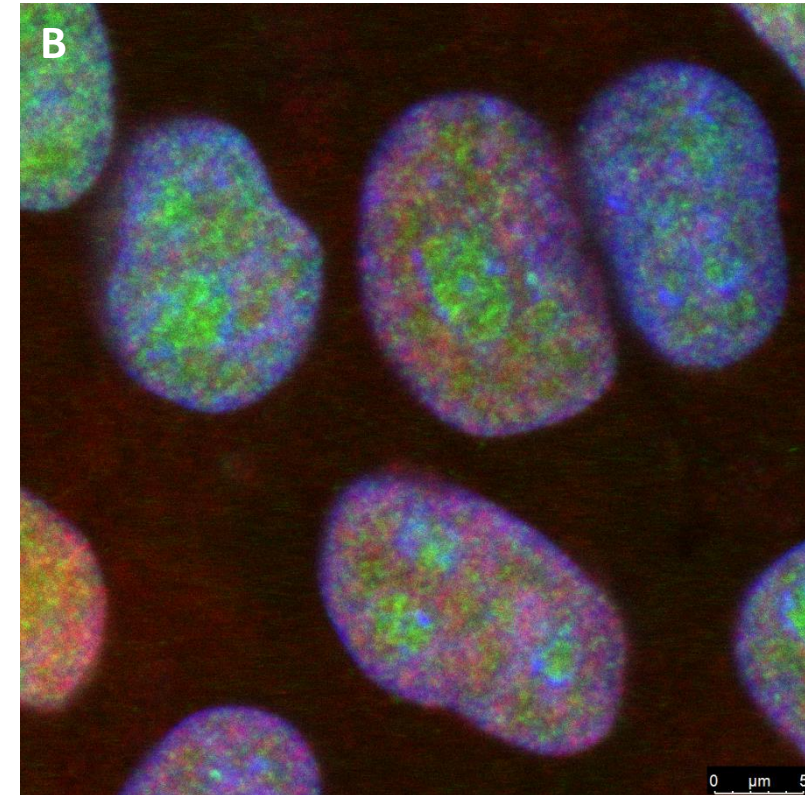

**Supplementary Figure 1. Immunofluorescence staining of iPSCs using pluripotent markers.** A) Immunofluorescence staining of pluripotent markers SOX2 (Red), NANOG (Green) and counterstain is with DAPI (blue), 20 x magnification. B) 40 x magnification showing the same as A. Scale bars are 25  $\mu\text{m}$  for A and 5  $\mu\text{m}$  for B.

Supplementary figure 2

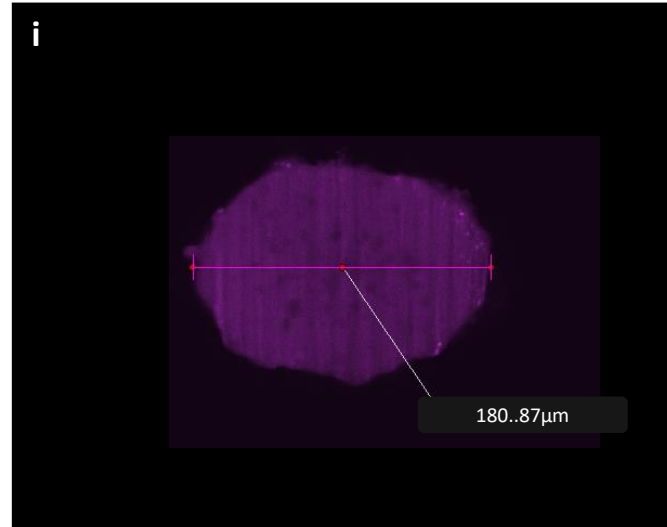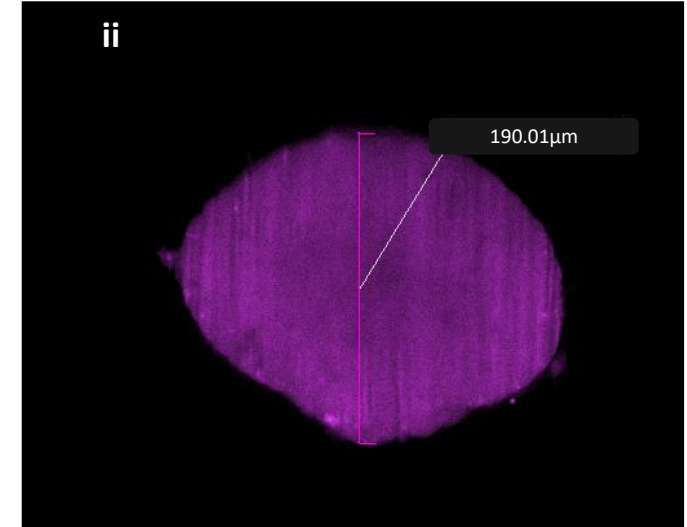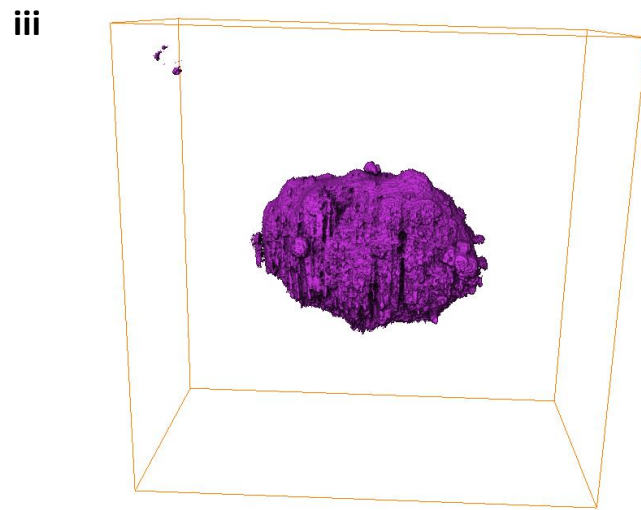

D07-EB2

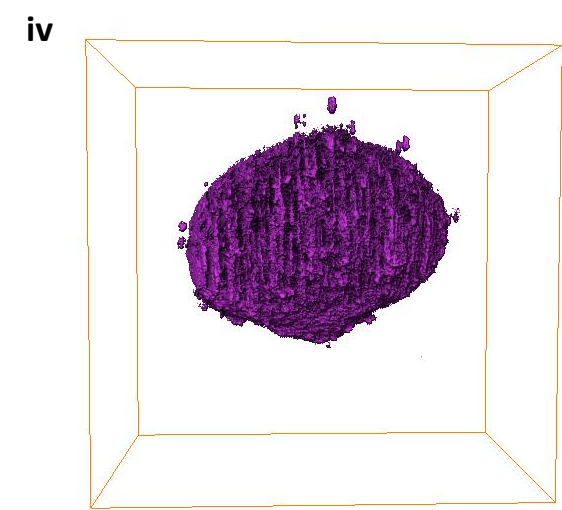

D07-EB3

**Supplementary Figure 2A. Characterization of day 7 EBs.** (i-ii) Diameter measurements of EBs (iii-iv) Volume rendering of EBs. Bounding box size for each EB (iii-iv) is given in Supplementary Table 1.

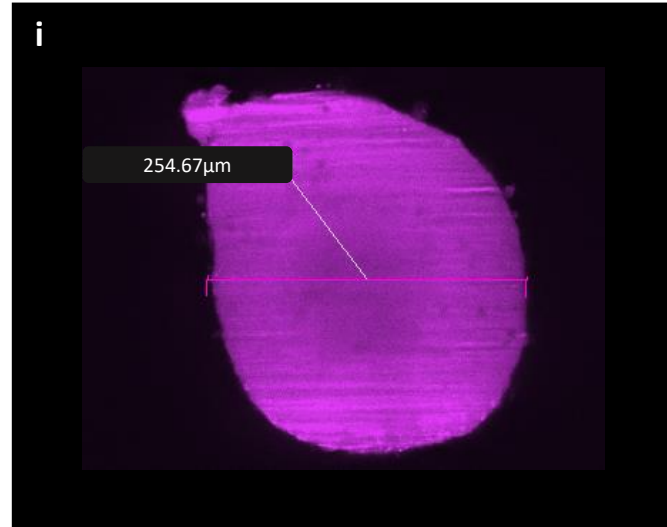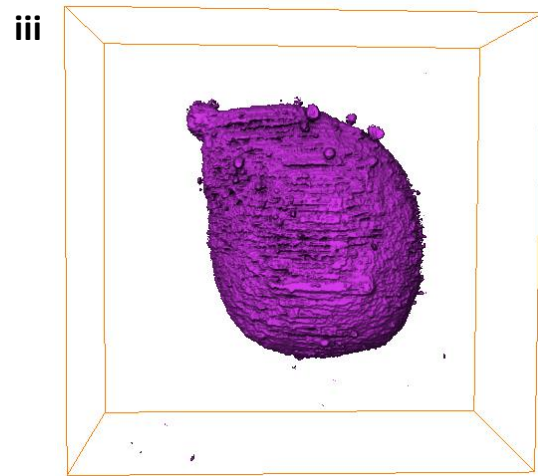

D10-EB2

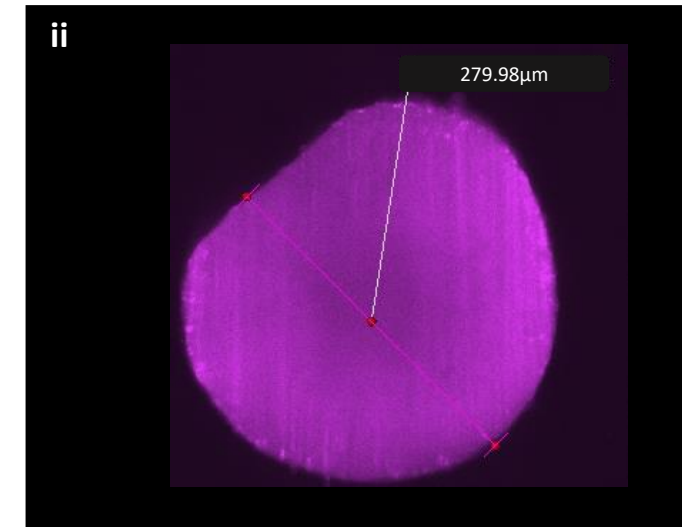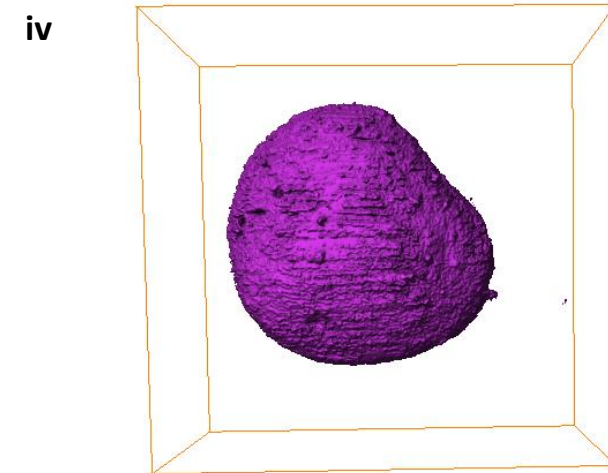

D10-EB3

**Supplementary Figure 2B. Characterization of day 10 EBs.** (i-ii) Diameter measurements of EBs (iii-iv) Volume rendering of EBs. Bounding box size for each EB (iii-iv) is given in Supplementary Table 1.

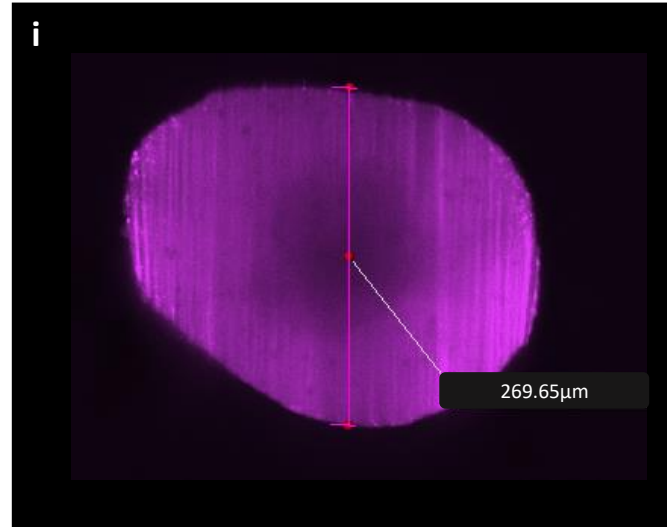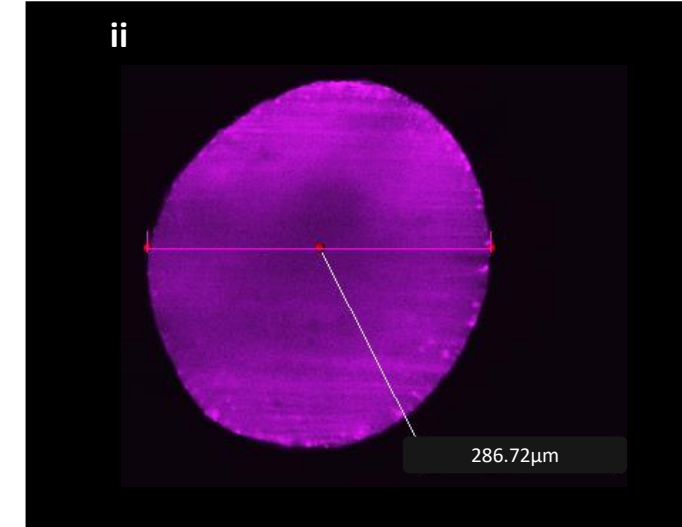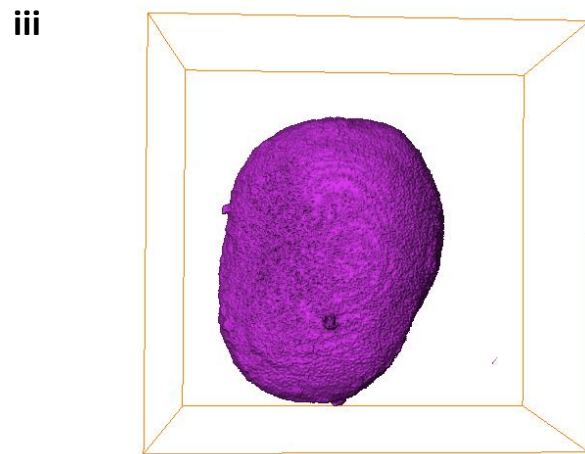

D11-EB2

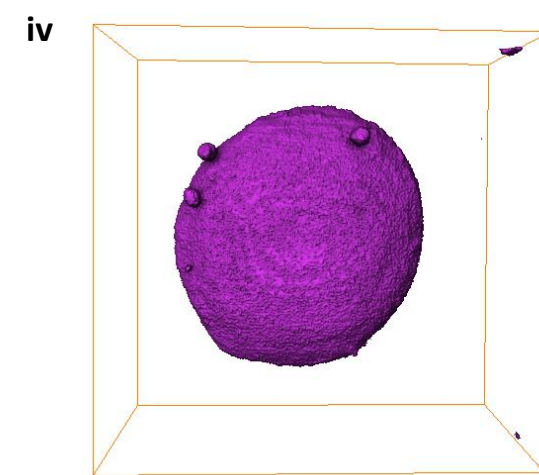

D11-EB3

**Supplementary Figure 2C. Characterization of day 11 EBs.** (i-ii) Diameter measurements of EBs (iii-iv) Volume rendering of EBs. Bounding box size for each EB (iii-iv) is given in Supplementary Table 1.



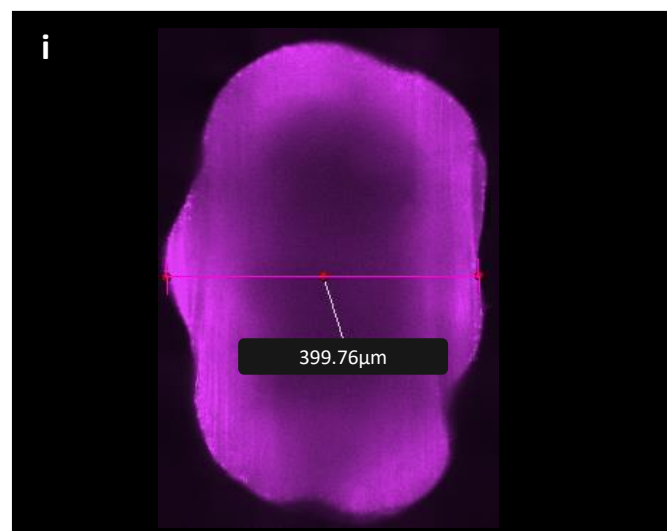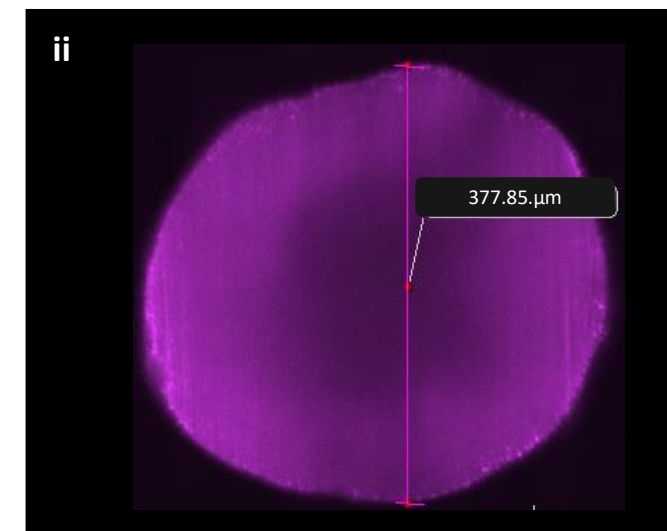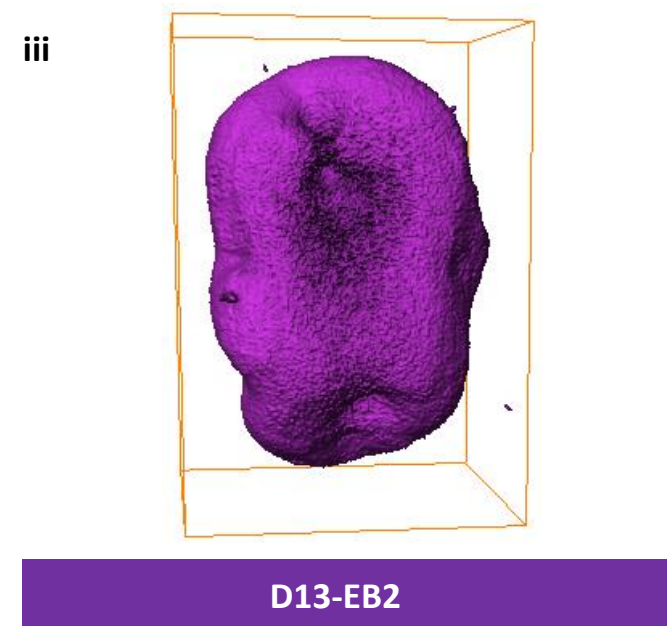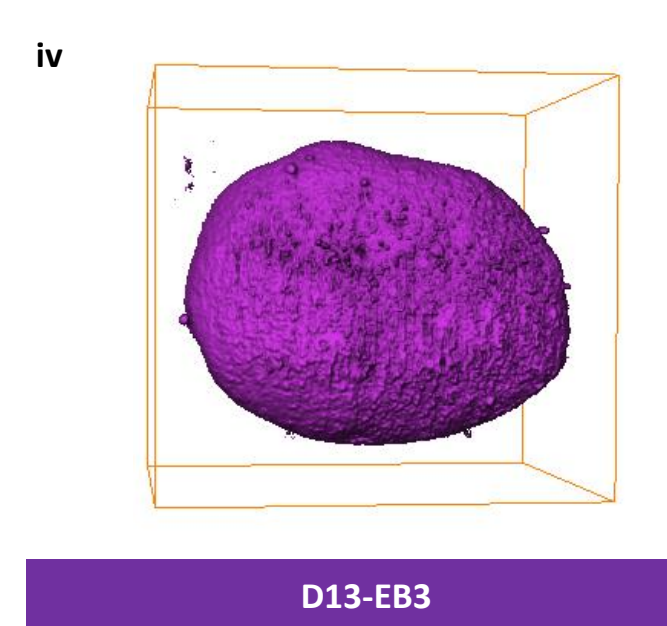

**Supplementary Figure 2D. Characterization of day 13 EBs.** (i-ii) Diameter measurements of EBs (iii-iv) Volume rendering of EBs. Bounding box size for each EB (iii-iv) is given in Supplementary Table 1.

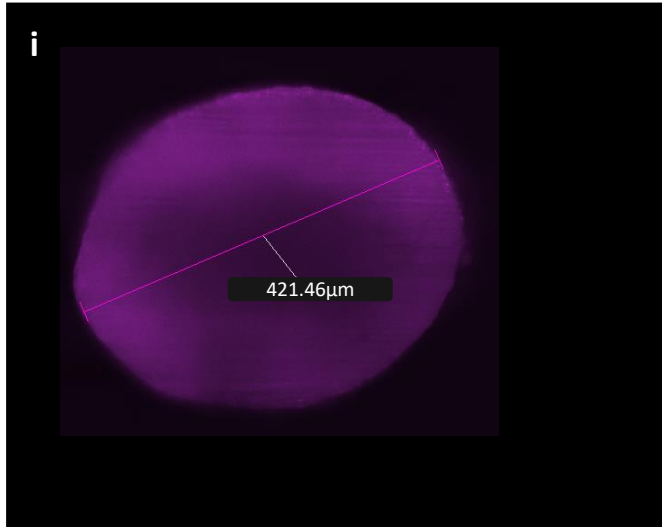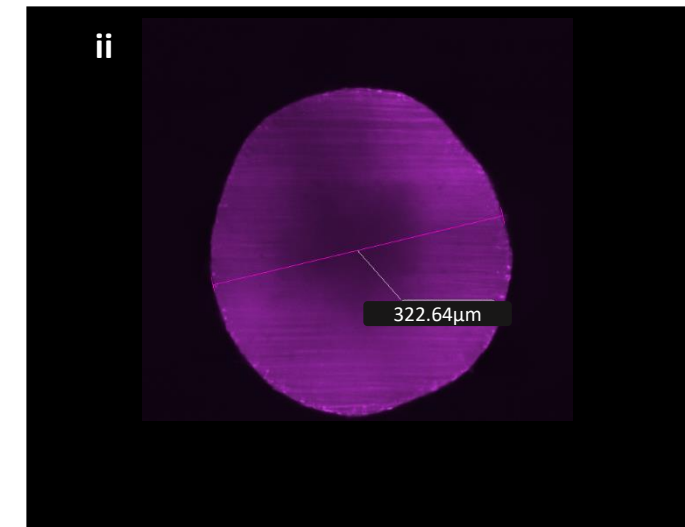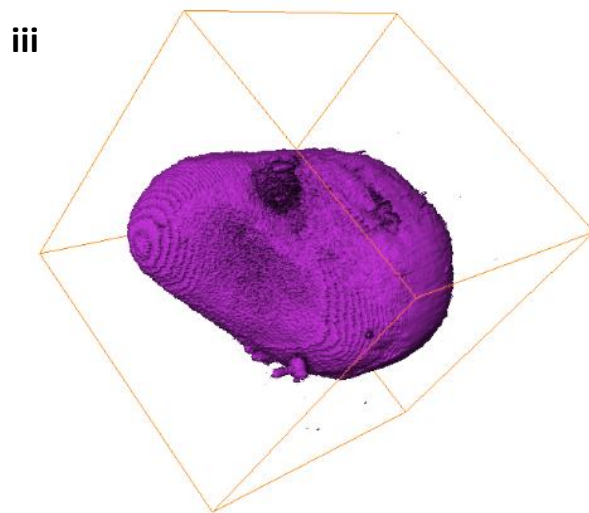

D14-EB2

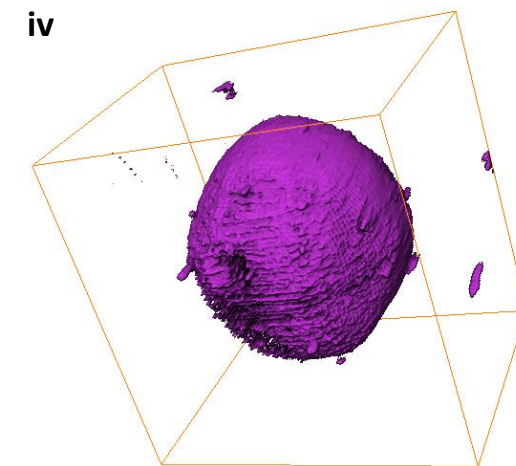

D14-EB3

**Supplementary Figure 2E. Characterization of day 14 EBs.** (i-ii) Diameter measurements of EBs (iii-iv) Volume rendering of EBs. Bounding box size for each EB (iii-iv) is given in Supplementary Table 1.



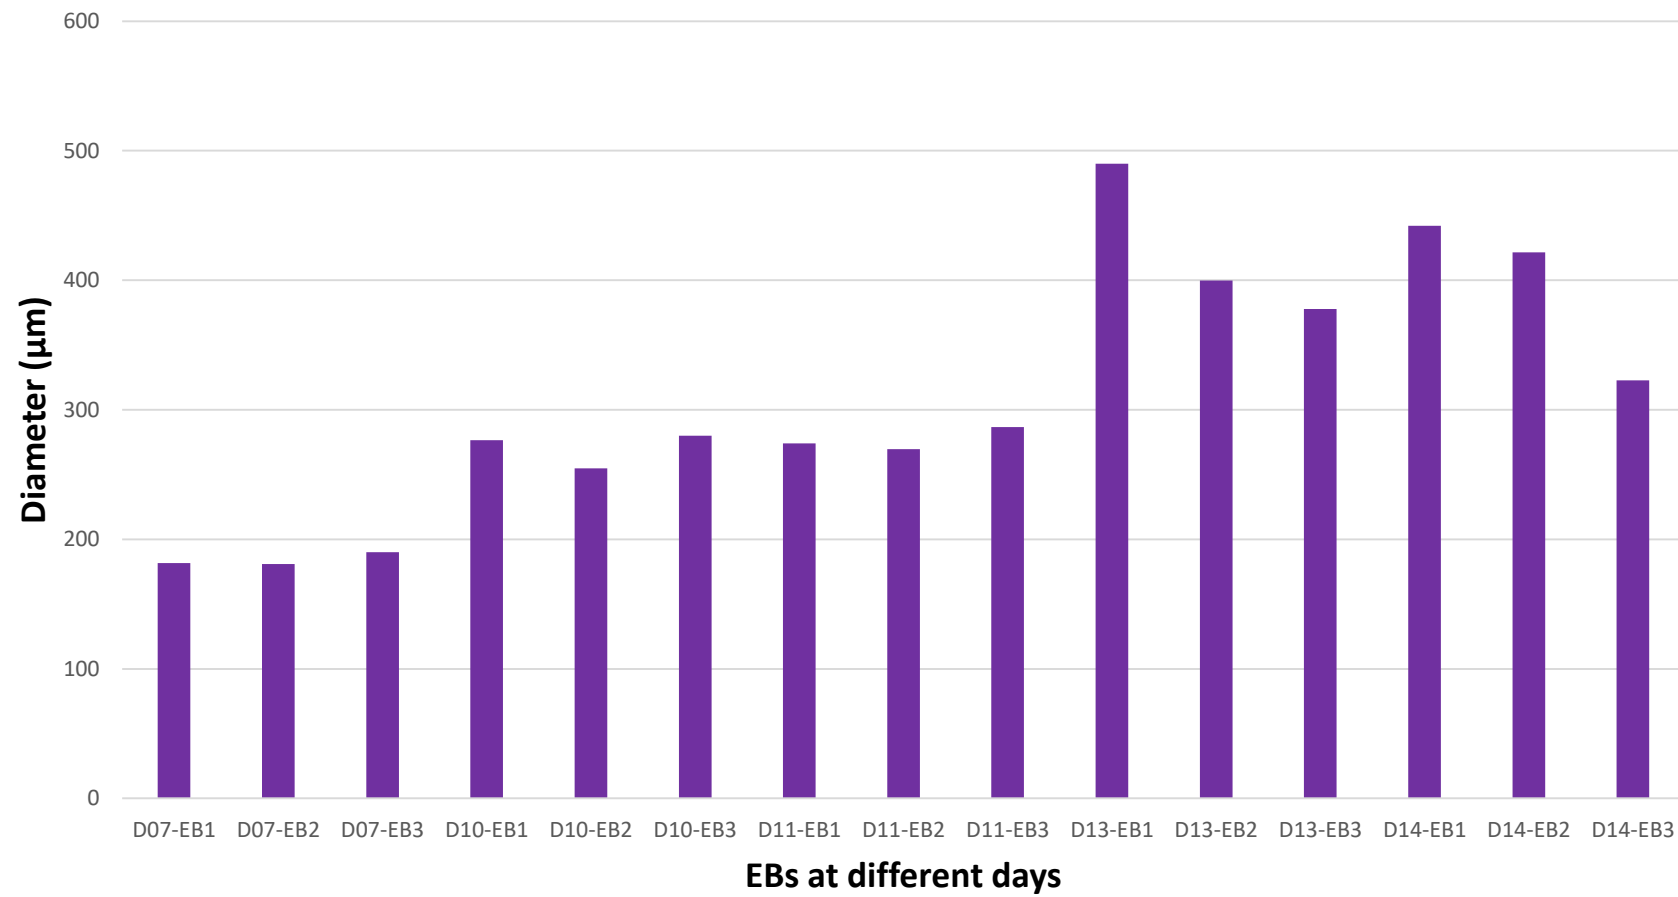

**Supplementary Figure 2F. Diameter analysis of individual EBs.** Graph showing the diameter of individual EBs from different days during growth.

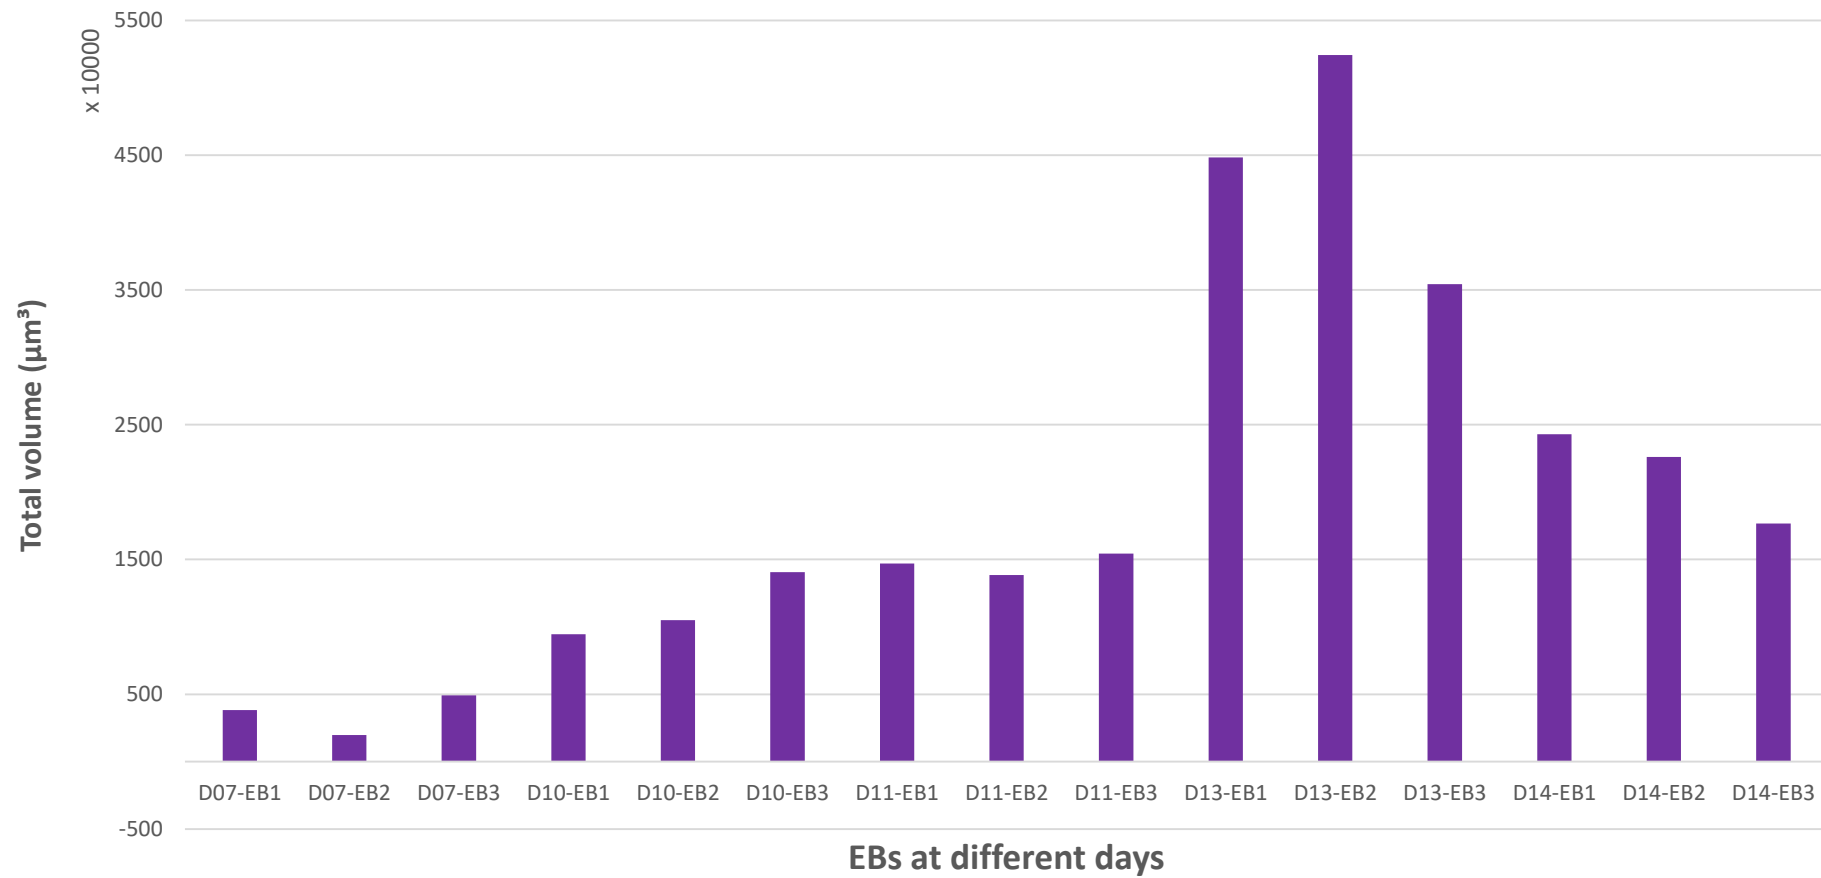

**Supplementary Figure 2H. Volume analysis of individual EBs.** Graph showing the volume of individual EBs from different days during growth.

# Supplementary figure 3

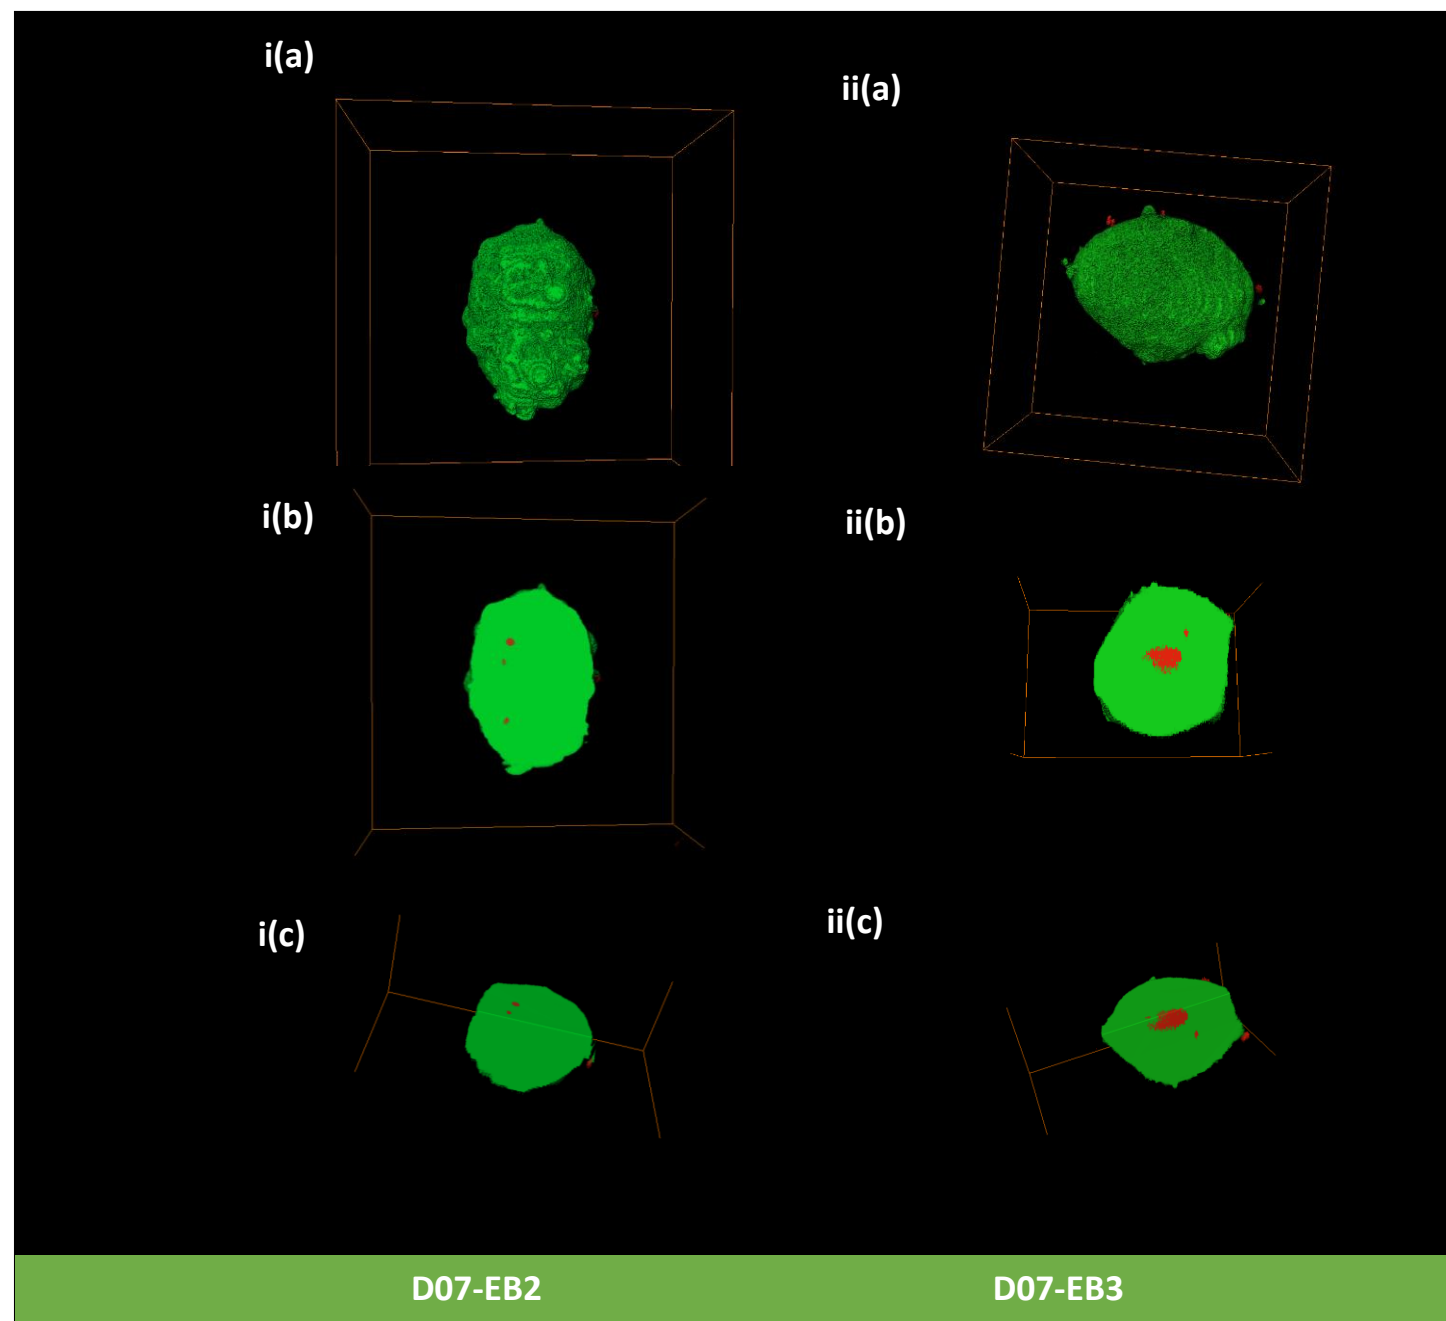

**Supplementary Figure 3A. 3D cell viability assessment of day 7 EBs.** (i(a)-ii(a)) Volume rendering of EBs. (i(b)-ii(b)) Cross-sections taken from the middle of the EBs. (i(c)-ii(c)) Further cross-sectional view of i(b)-ii(b). Green shows live and red shows dead cells. Bounding box size for each EB is given in Supplementary Table 1.

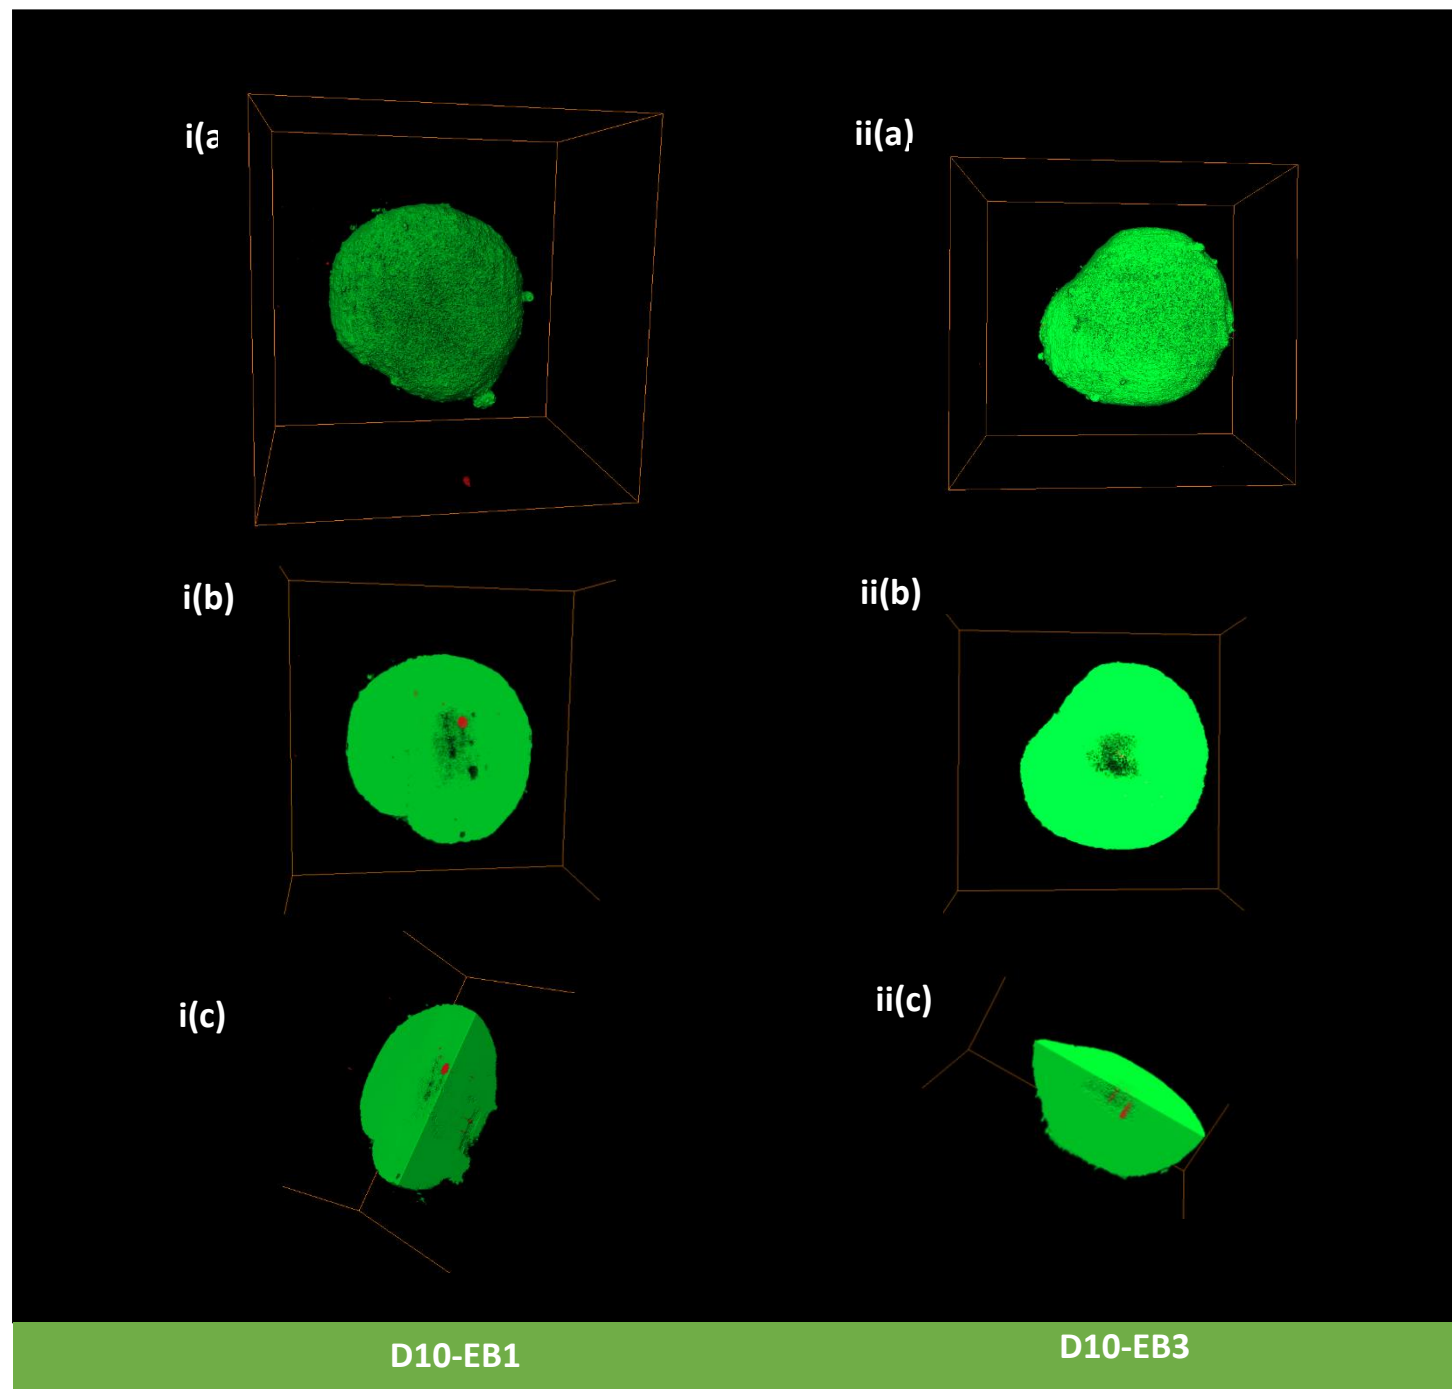

**Supplementary Figure 3B. 3D cell viability assessment of day 10 EBs.** (i(a)-ii(a)) Volume rendering of EBs. (i(b)-ii(b)) Cross-sections taken from the middle of the EBs. (i(c)-ii(c)) Further cross-sectional view of i(b)-ii(b). Green shows live and red shows dead cells. Bounding box size for each EB is given in Supplementary Table 1.

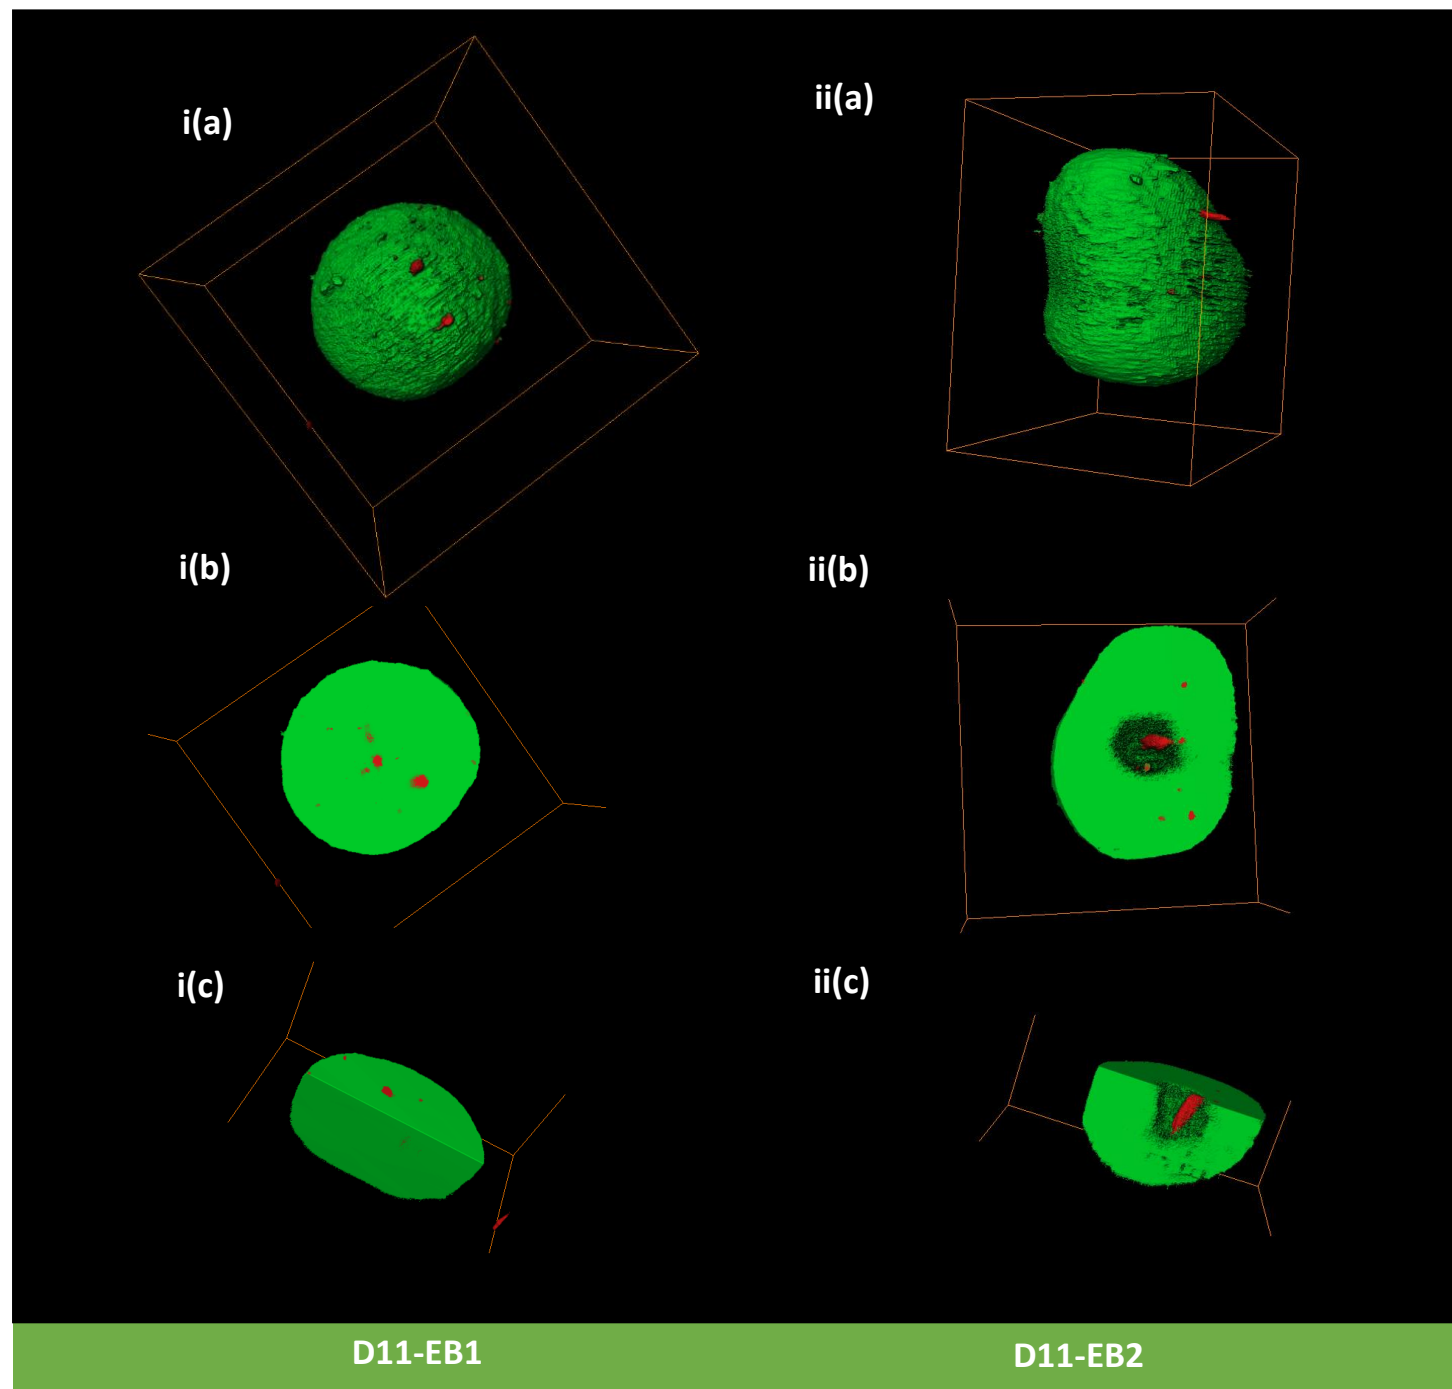

**Supplementary Figure 3C. 3D cell viability assessment of day 11 EBs.** (i(a)-ii(a)) Volume rendering of EBs. (i(b)-ii(b)) Cross-sections taken from the middle of the EBs. (i(c)-ii(c)) Further cross-sectional view of i(b)-ii(b). Green shows live and red shows dead cells. Bounding box size for each EB is given in Supplementary Table 1.



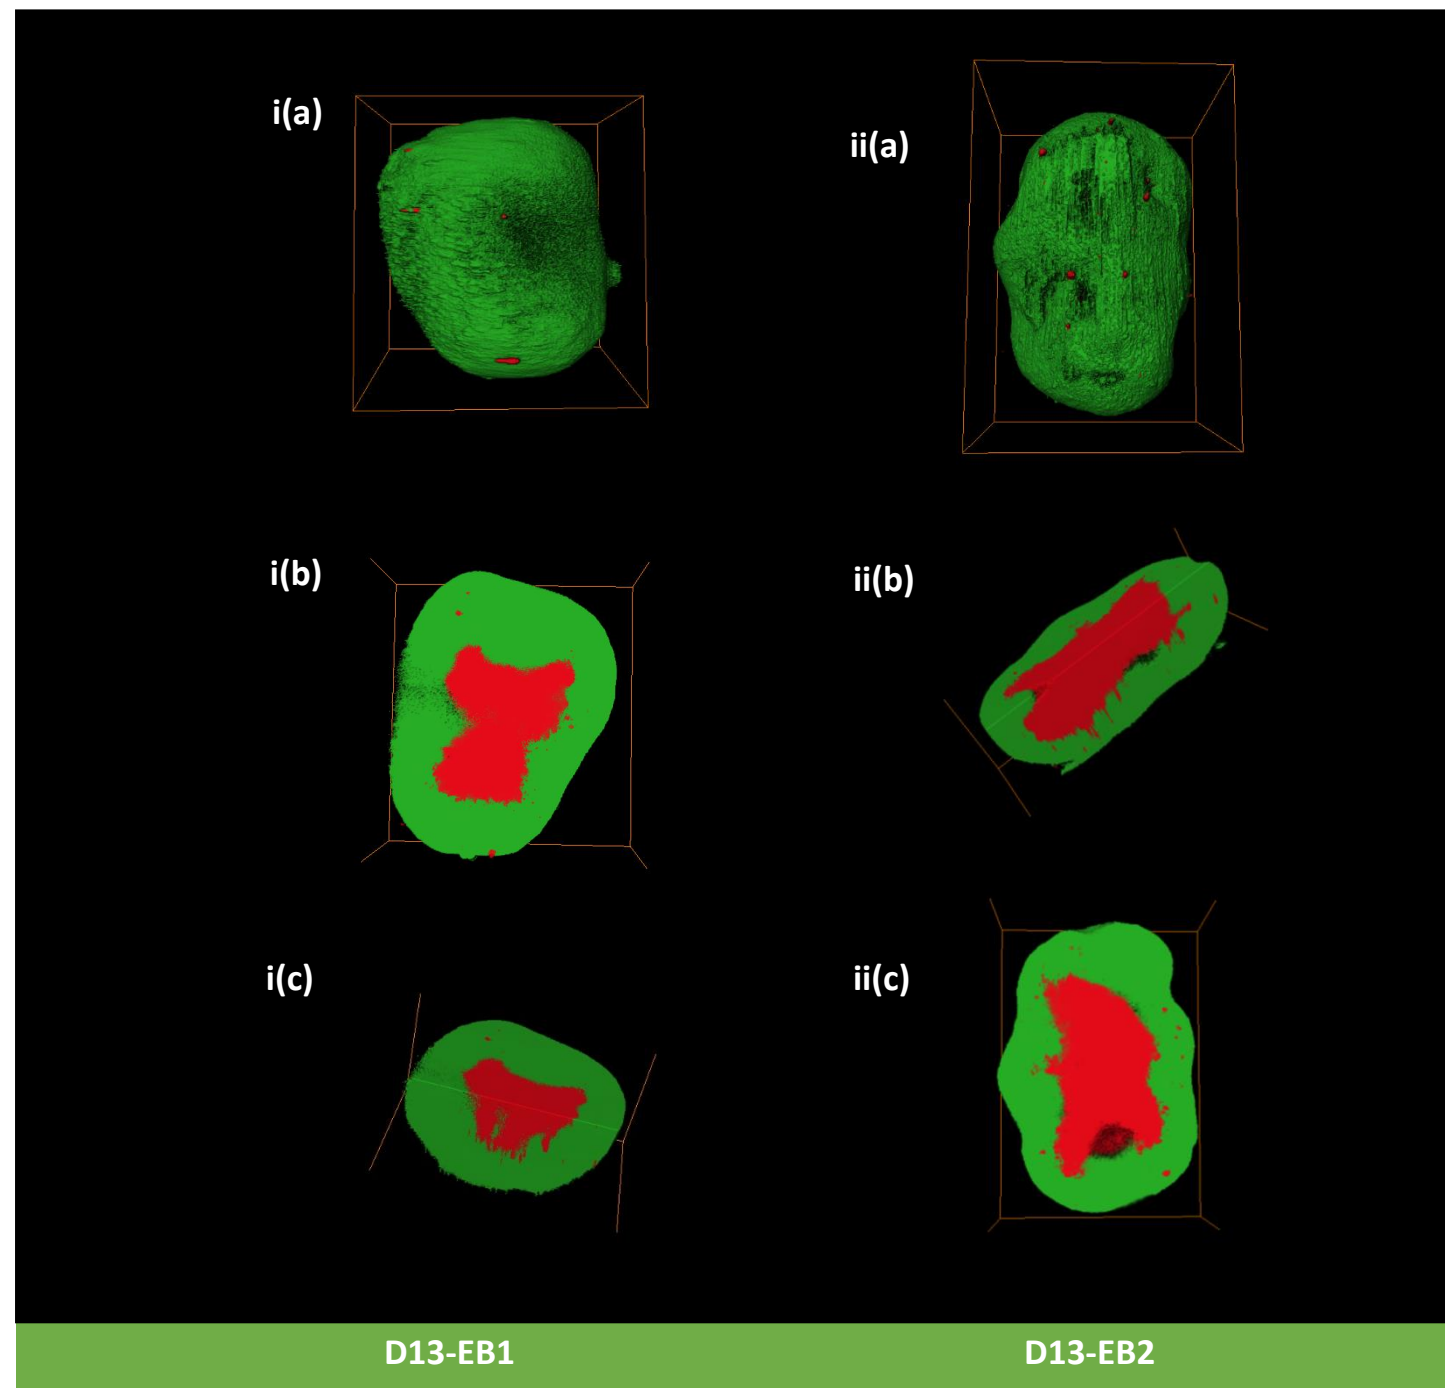

**Supplementary Figure 3D. 3D cell viability assessment of day 13 EBs.** (i(a)-ii(a)) Volume rendering of EBs. (i(b)-ii(b)) Cross-sections taken from the middle of the EBs. (i(c)-ii(c)) Further cross-sectional view of i(b)-ii(b). Green shows live and red shows dead cells. Bounding box size for each EB is given in Supplementary Table 1.

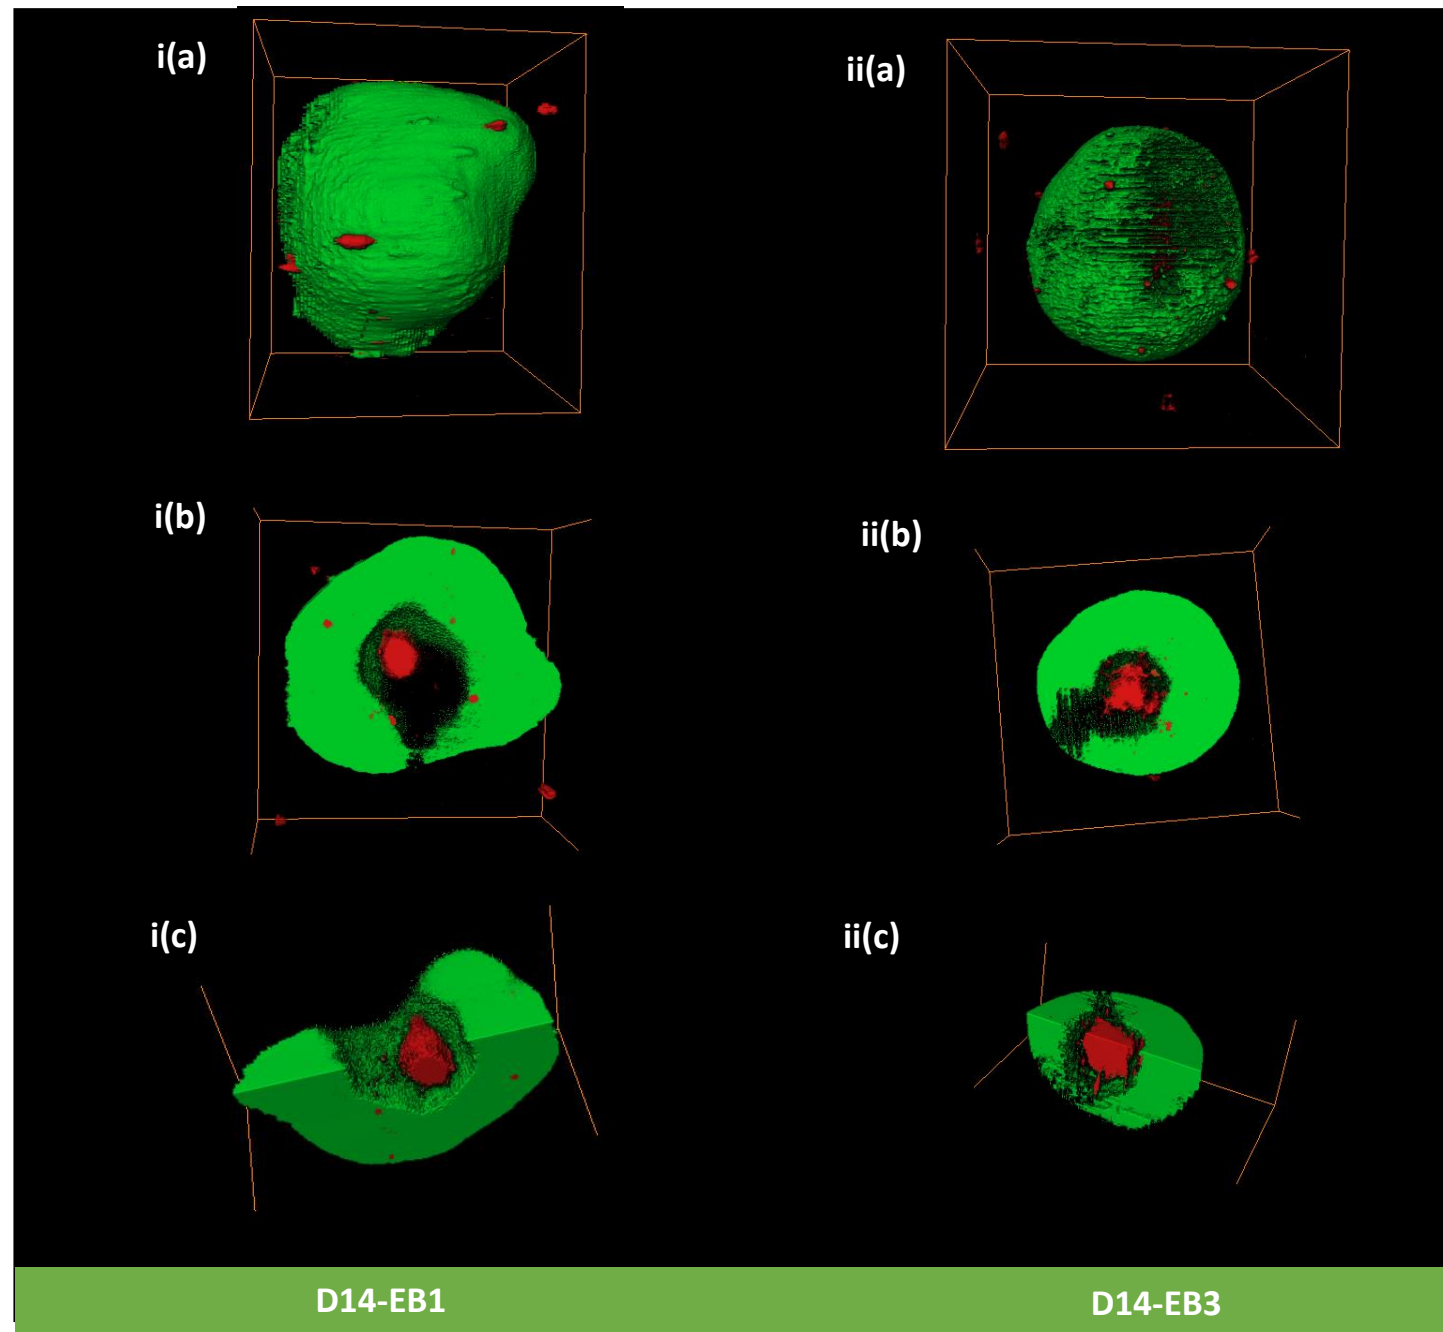

**Supplementary Figure 3E. 3D cell viability assessment of day 14 EBs.** (i(a)-ii(a)) Volume rendering of EBs. (i(b)-ii(b)) Cross-sections taken from the middle of the EBs. (i(c)-ii(c)) Further cross-sectional view of i(b)-ii(b). Green shows live and red shows dead cells. Bounding box size for each EB is given in Supplementary Table 1.

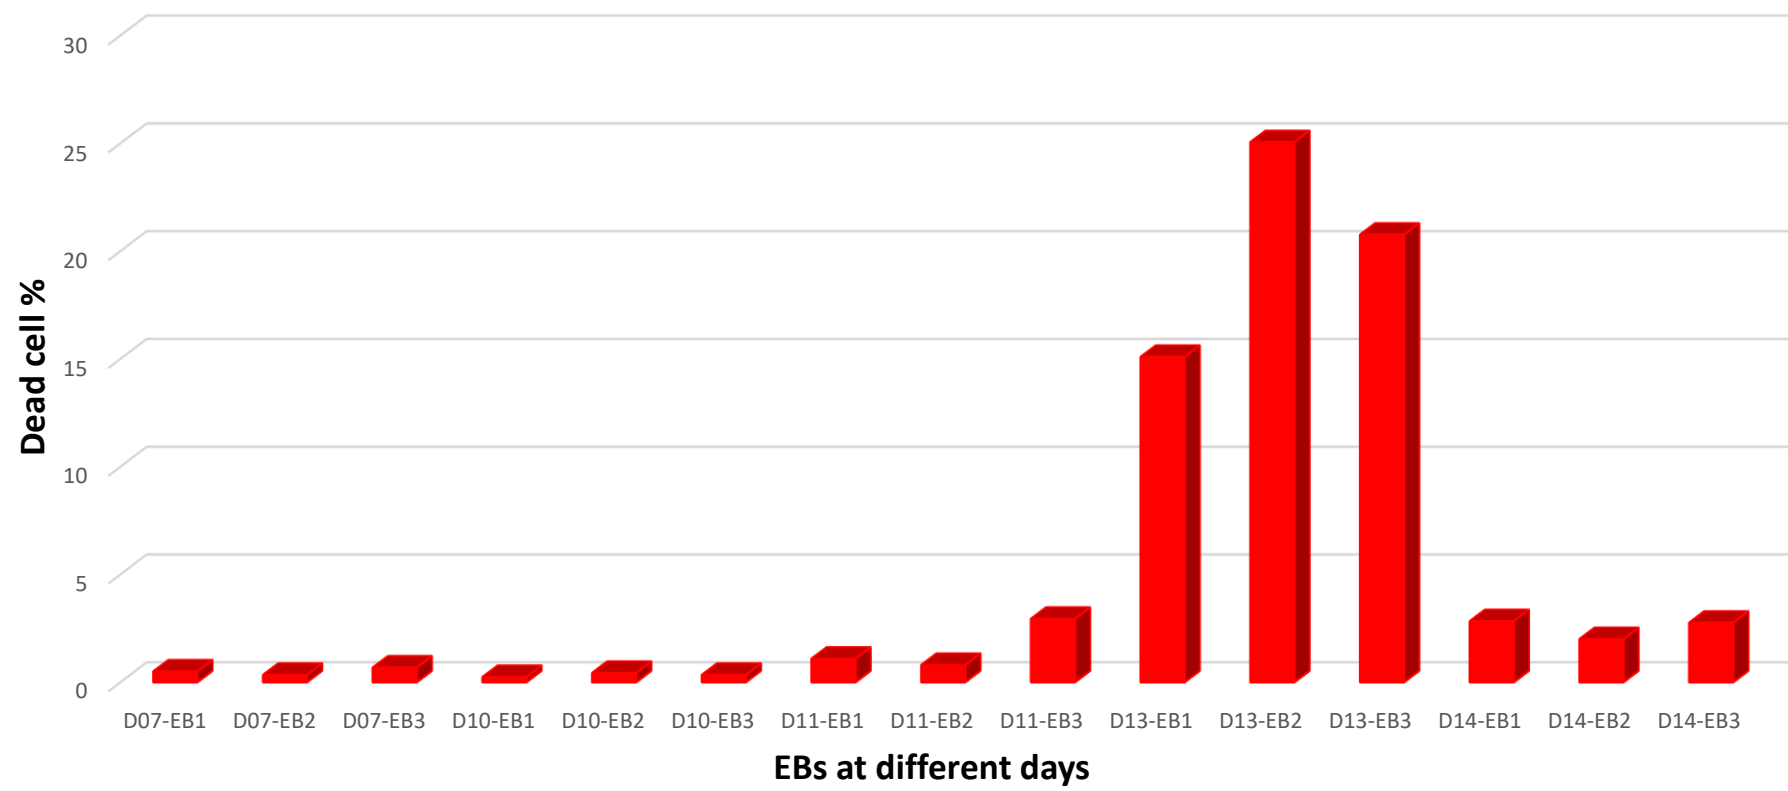

**Supplementary Figure 3F.** Dead cell percentage of EBs at different days.

Supplementary figure 4

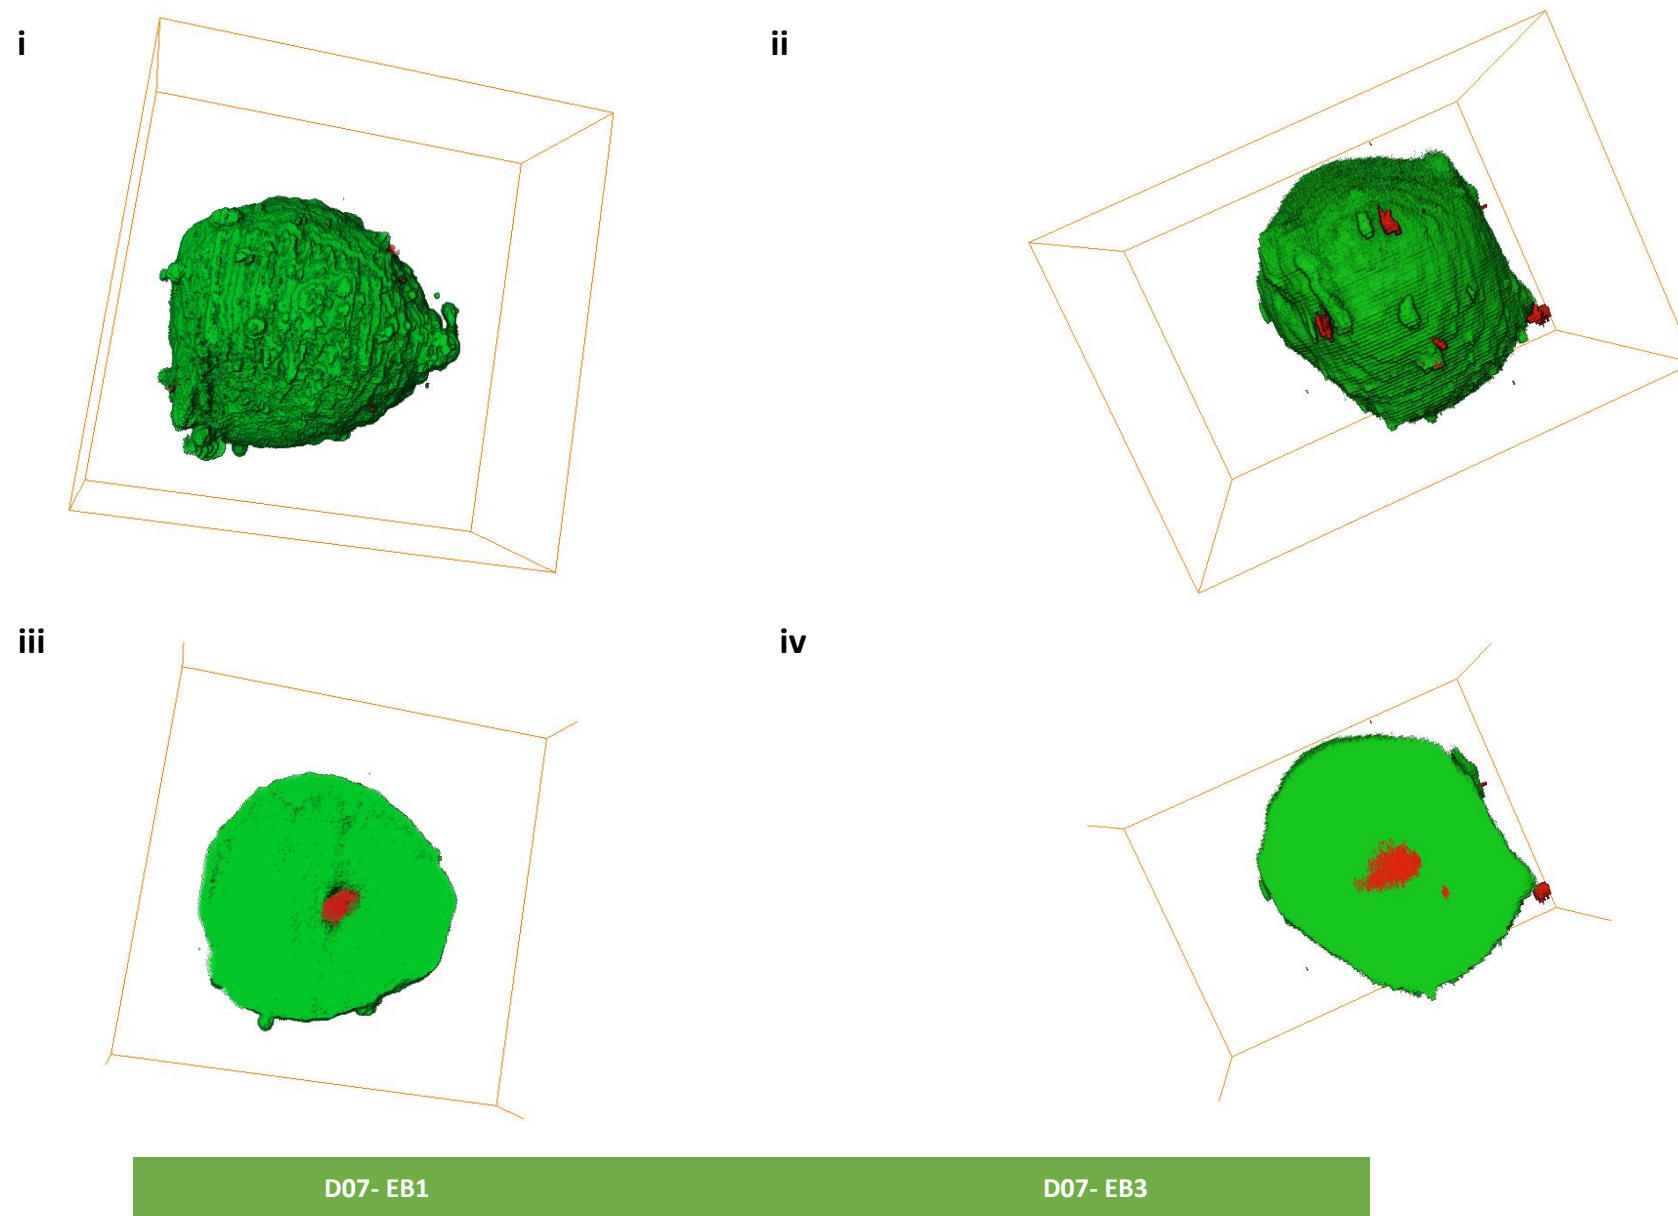

**Supplementary Figure 4A. Morphological analysis of day 7 EBs.** (i-ii) Volume rendering of EBs. (iii-iv) Cross-sections taken from middle of the EBs (i-ii). Green shows live and red shows dead cells. Bounding box size for each EB is given in Supplementary Table 1.

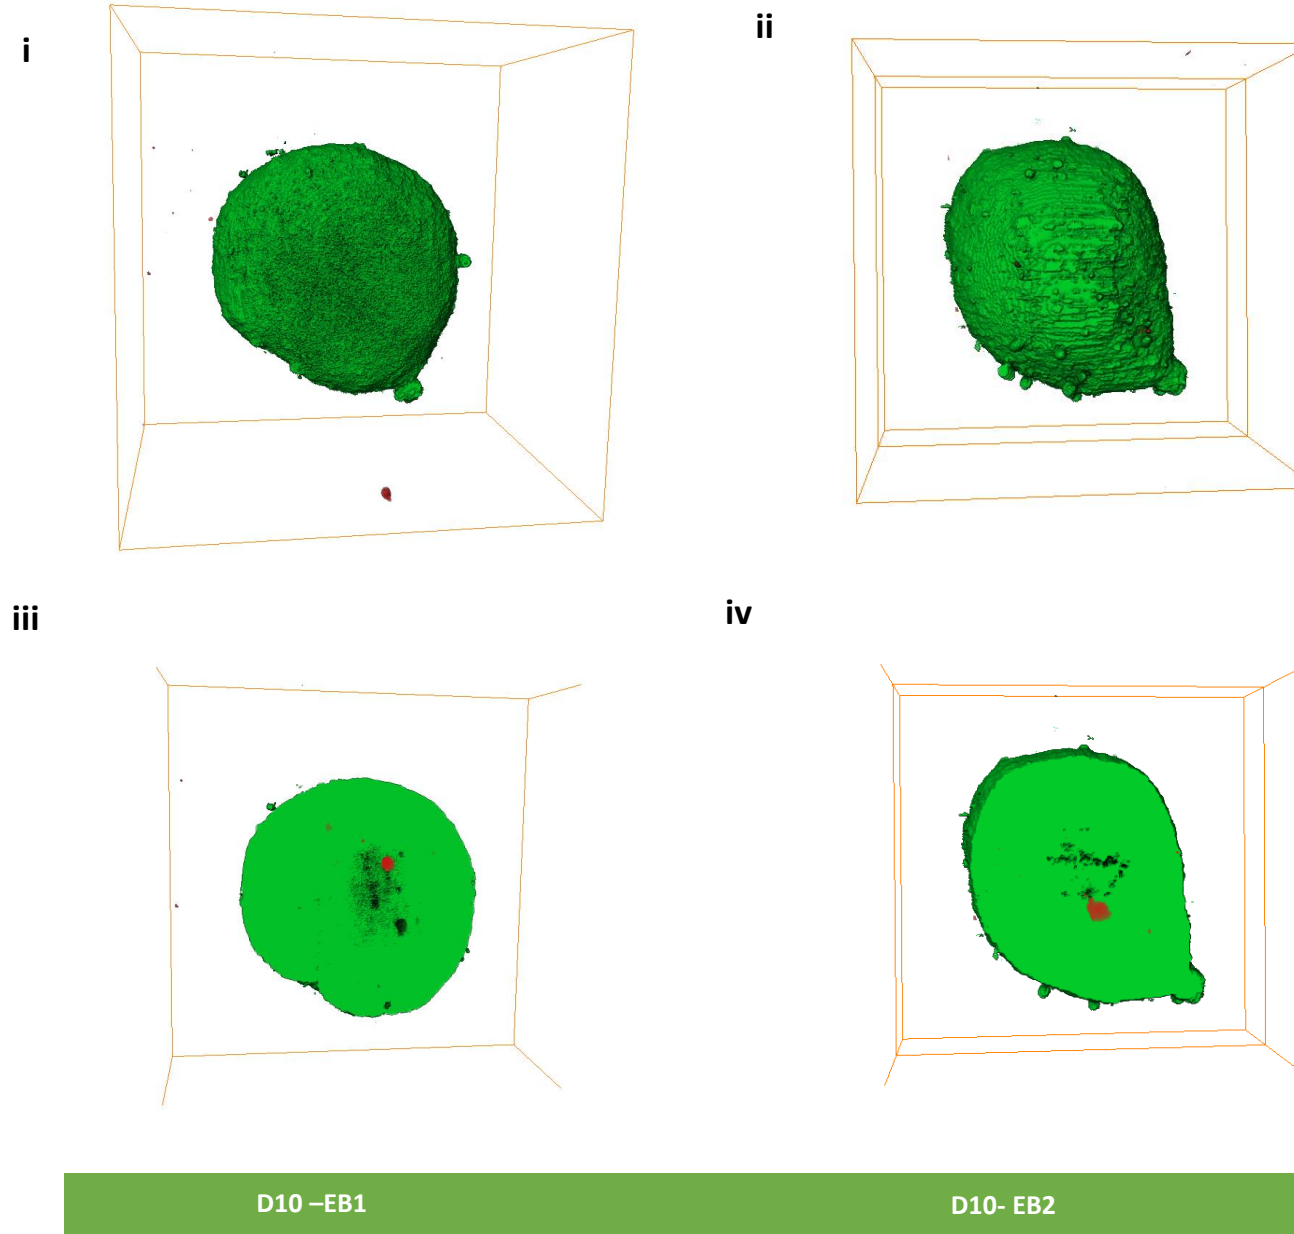

**Supplementary Figure 4B. Morphological analysis of day 10 EBs.** (i-ii) Volume rendering of EBs. (iii-iv) Cross-sections taken from middle of the EBs (i-ii). Green shows live and red shows dead cells. Bounding box size for each EB is given in Supplementary Table 1.



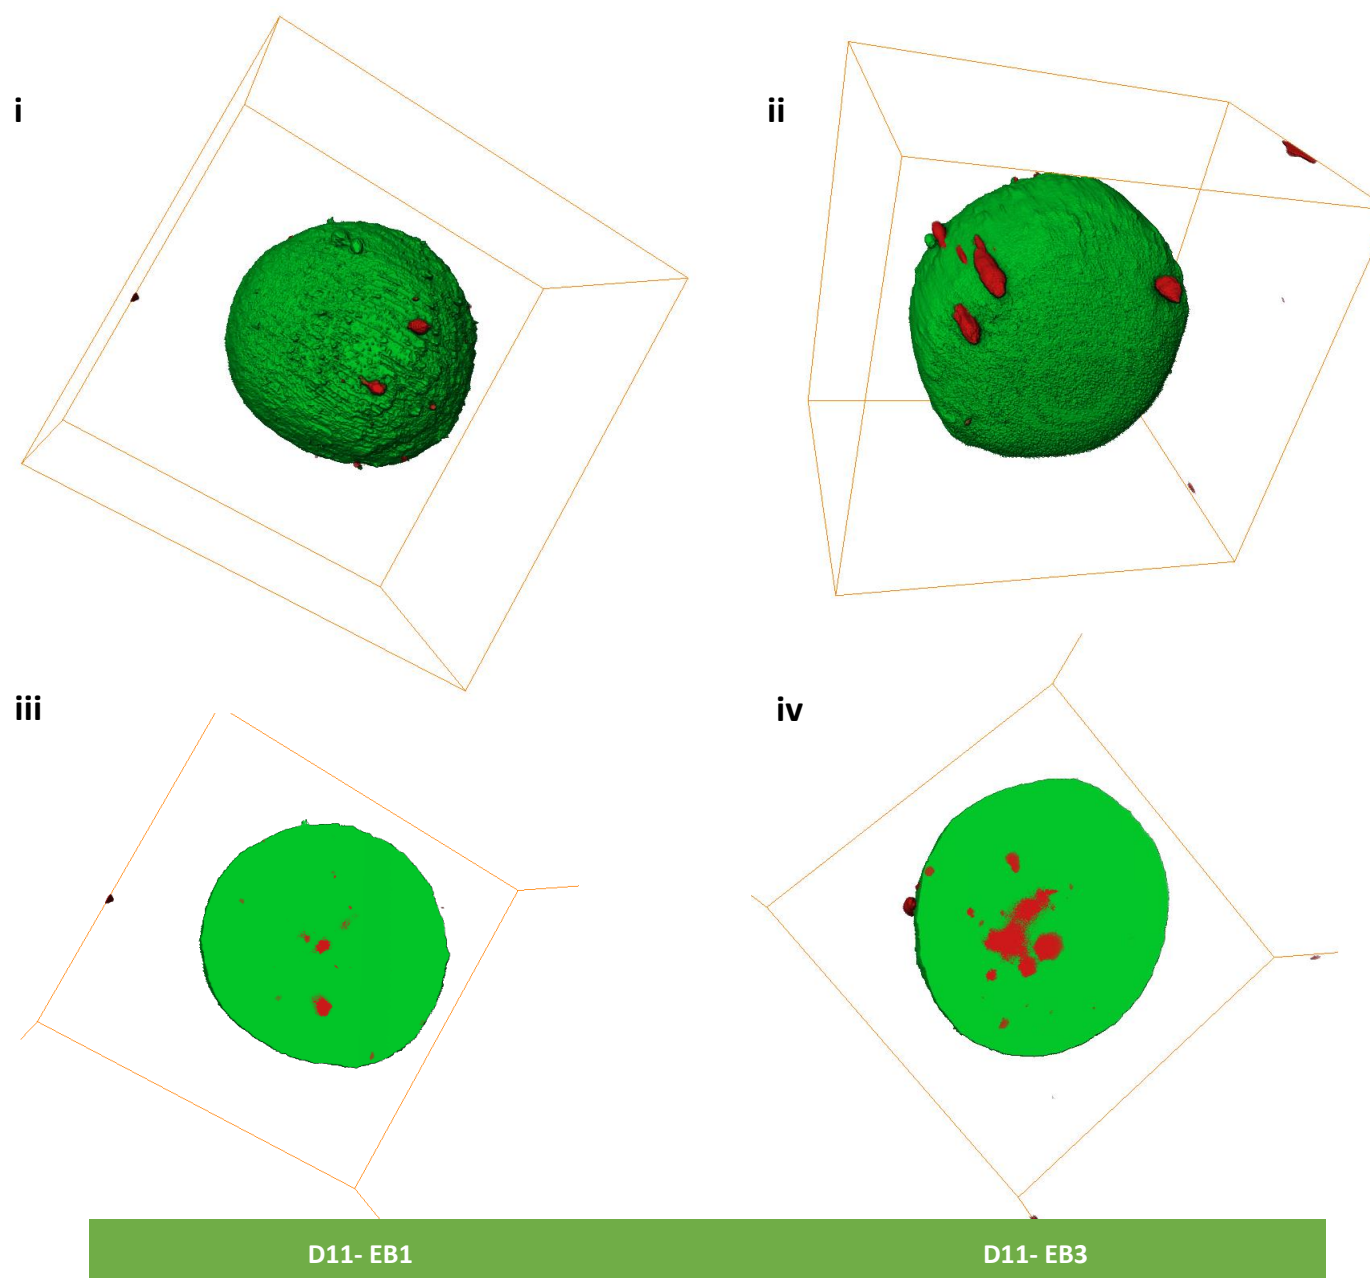

**Supplementary Figure 4C. Morphological analysis of day 11 EBs.** (i-ii) Volume rendering of EBs. (iii-iv) Cross-sections taken from middle of the EBs (i-ii). Green shows live and red shows dead cells. Bounding box size for each EB is given in Supplementary Table 1.

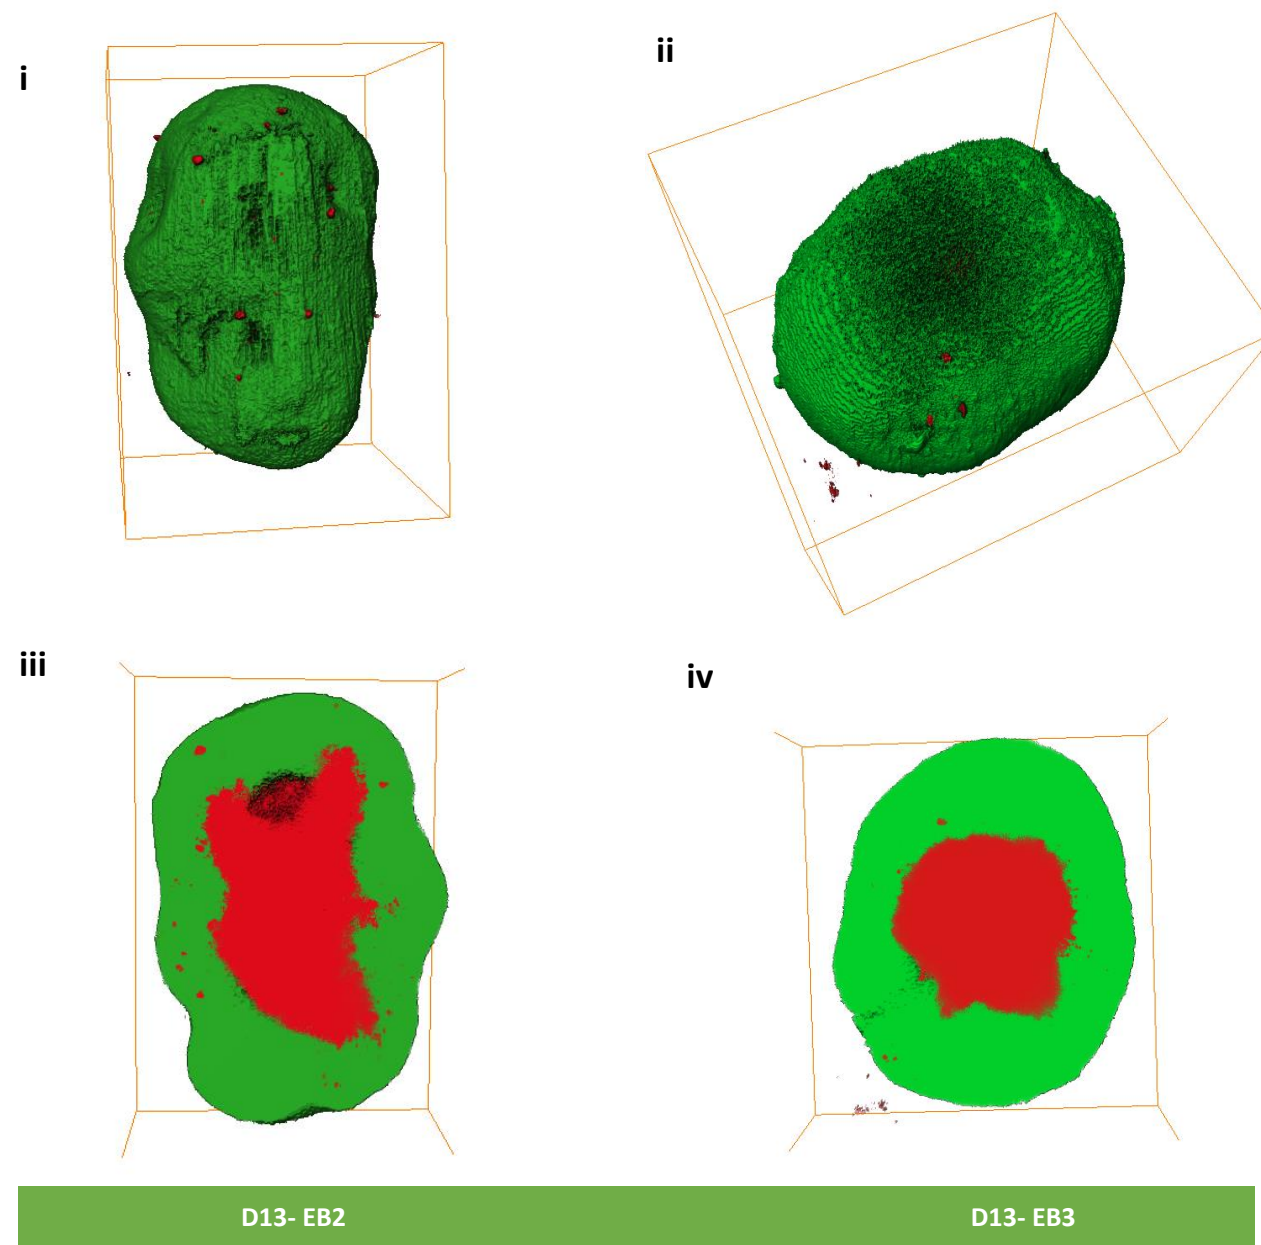

**Supplementary Figure 4D. Morphological analysis of day 13 EBs.** (i-ii) Volume rendering of EBs. (iii-iv) Cross-sections taken from middle of the EBs (i-ii). Green shows live and red shows dead cells. Bounding box size for each EB is given in Supplementary Table 1.

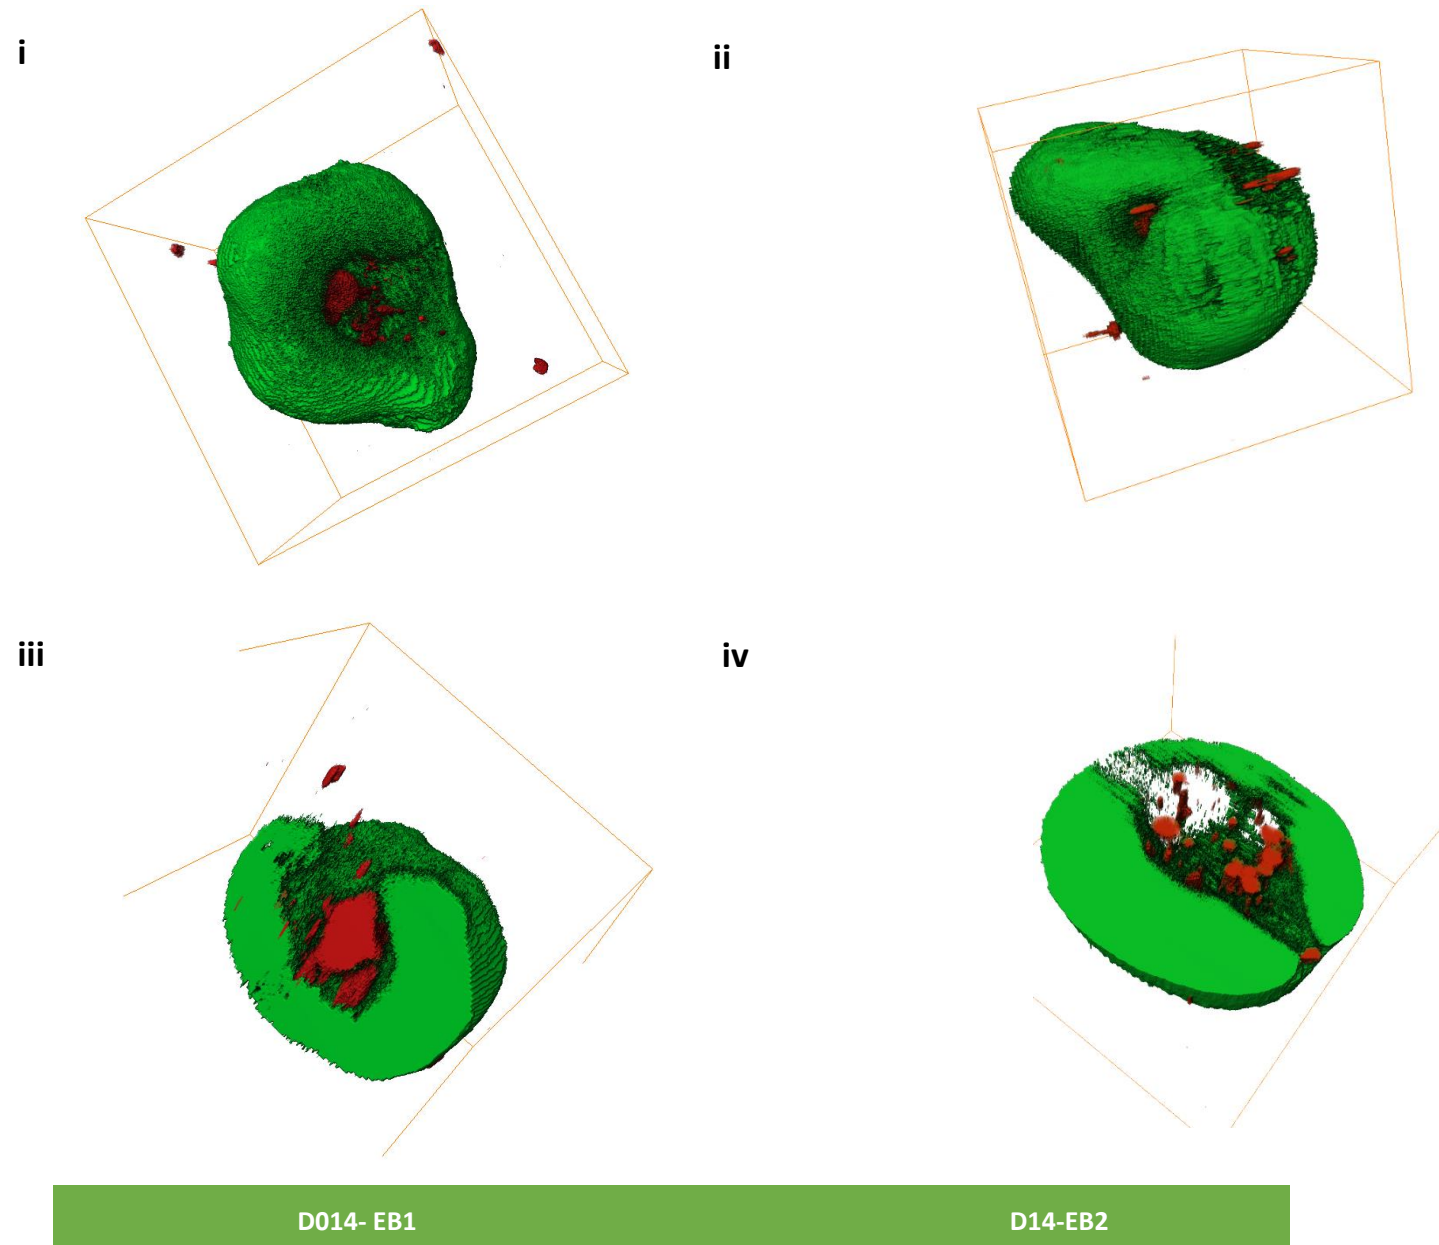

**Supplementary Figure 4E. Morphological analysis of day 14 EBs.** (i-ii) Volume rendering of EBs. (iii-iv) Cross-sections taken from middle of the EBs (i-ii). Green shows live and red shows dead cells. Bounding box size for each EB is given in Supplementary Table 1.

# Supplementary figure 5

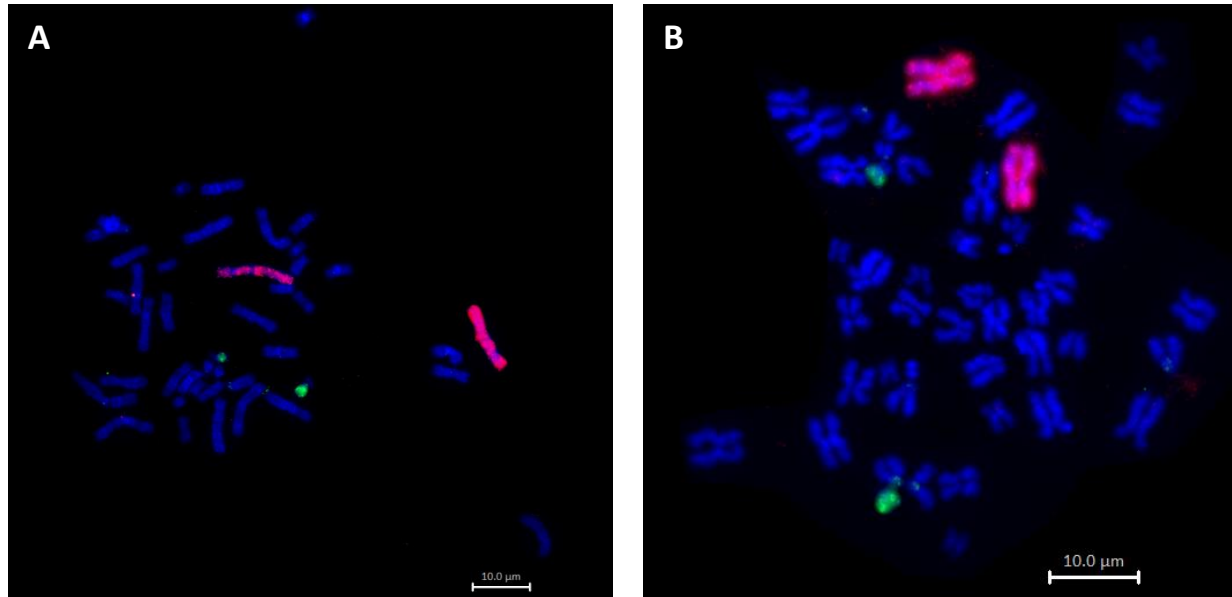

**Supplementary Figure 5. Two-color FISH on iPSC metaphase chromosomes.** Direct labelled chromosome-specific “paints” for chromosome 2 (*red*) and 22 (*green*) on A) ipsc spread from a 2D culture and B) 3D EBs at day 8.

# Supplementary Table 1



| Embryoid Bodies at different days | Bounding box size (μm) | Total slices in XY | Diameter (μm) | Average Diameter (EB1-4) (μm) | Live cell volume (μm³) | Dead cell volume (μm³) | Inside Dead cell volume (μm³) | Outside dead cell volume (μm³) | Total volume (live + dead)(μm³) | Average volume (EB 1-3) (μm3) | Live volume % | Dead volume % | Dead cell average % | Inside dead cells % | Outside dead cells % |
|-----------------------------------|------------------------|--------------------|---------------|-------------------------------|------------------------|------------------------|-------------------------------|--------------------------------|---------------------------------|-------------------------------|---------------|---------------|---------------------|---------------------|----------------------|
| D07-EB1                           | 359x364x231            | 77                 | 181.77        | 184.2166667                   | 3822112.848            | 18951.20361            | 18951.20361                   | 0                              | 3841064.051                     | 3583371.523                   | 99.5          | 0.5           | 0.50                | 0.5                 | 0                    |
| D07-EB2                           | 359x364x192            | 64                 | 180.87        |                               | 1973140.668            | 6617.781669            | 4575.787548                   | 2041.994121                    | 1979758.449                     |                               | 99.66         | 0.34          |                     | 0.235               | 0.105                |
| D07-EB3                           | 360x365x249            | 83                 | 190.01        |                               | 4895872.141            | 33419.93564            | 29404.14868                   | 4015.786966                    | 4929292.076                     |                               | 99.32         | 0.68          |                     | 0.60                | 0.08                 |
| D10-EB1                           | 475x467x351            | 117                | 276.6         | 270.4166667                   | 9423933.172            | 22893.32997            | 21798.8899                    | 1094.44007                     | 9446826.501                     | 11334193.78                   | 99.76         | 0.24          | 0.33                | 0.23                | 0.01                 |
| D10-EB2                           | 476x467x282            | 94                 | 254.67        |                               | 10450121.77            | 44773.64965            | 44773.64965                   | 0                              | 10494895.41                     |                               | 99.57         | 0.43          |                     | 0.43                | 0                    |
| D10-EB3                           | 475x467x345            | 115                | 279.98        |                               | 14013668.98            | 47190.4698             | 47190.4698                    | 0                              | 14060859.44                     |                               | 99.66         | 0.34          |                     | 0.34                | 0                    |
| D11-EB1                           | 475x467x366            | 122                | 274.09        | 276.82                        | 14543273.25            | 159610.8052            | 144822.2952                   | 14788.51007                    | 14702884.05                     | 14665360.41                   | 98.91         | 1.09          | 1.61                | 0.99                | 0.1                  |
| D11-EB2                           | 475x467x345            | 115                | 269.65        |                               | 13736724.6             | 109700.3132            | 104898.1802                   | 4802.133041                    | 13846424.91                     |                               | 99.20         | 0.8           |                     | 0.77                | 0.03                 |
| D11-EB3                           | 476x467x333            | 111                | 286.72        |                               | 14992731.13            | 454041.1475            | 450955.8674                   | 3085.280073                    | 15446772.28                     |                               | 97.06         | 2.94          |                     | 2.92                | 0.02                 |
| D13-EB1                           | 485x523x489            | 163                | 489.89        | 422.5                         | 38057758.67            | 6762949.543            | 6762949.543                   | 0                              | 44820708.21                     | 44229167.08                   | 84.91         | 15.09         | 20.3                | 15.09               | 0                    |
| D13-EB2                           | 688x472x480            | 154                | 399.76        |                               | 39292301.23            | 13135385.23            | 13135385.23                   | 0                              | 52427686.46                     |                               | 74.95         | 25.05         |                     | 25.05               | 0                    |
| D13-EB3                           | 486x523x414            | 138                | 377.85        |                               | 28081311.84            | 7357794.734            | 7357794.734                   | 0                              | 35439106.57                     |                               | 79.24         | 20.76         |                     | 20.76               | 0                    |
| D14-EB1                           | 515x523x441            | 147                | 441.94        | 395.3466667                   | 23615142.76            | 686708.5602            | 671203.0767                   | 15505.48347                    | 24301851.32                     | 21525354.42                   | 97.17         | 2.83          | 2.53                | 2.77                | 0.064                |
| D14-EB2                           | 516x523x528            | 176                | 421.46        |                               | 22175685.66            | 435108.9554            | 435108.9554                   | 0                              | 22610794.61                     |                               | 98.0          | 2.00          |                     | 2.00                | 0                    |
| D14-EB3                           | 515x523x387            | 129                | 322.64        |                               | 17176419.02            | 486998.3299            | 461507.6214                   | 25490.70844                    | 17663417.35                     |                               | 97.24         | 2.76          |                     | 2.616               | 0.144                |

**Supplementary Table 1.** Table summarizes the different parameters for EBs at different days of growth.

# Supplementary Table 2

| EBs at different days | Dead cells attached to the outer EB surface | Dead cells surrounding the EB | Dead cells inside EB | Dead cell (dense core or scattered around EB) |
|-----------------------|---------------------------------------------|-------------------------------|----------------------|-----------------------------------------------|
| D07-EB1               | Y                                           | N                             | Y                    | DC and S                                      |
| D07-EB2               | Y                                           | Y                             | Y                    | S                                             |
| D07-EB3               | Y                                           | Y                             | Y                    | DC and S                                      |
| D10-EB1               | Y                                           | Y                             | Y                    | S                                             |
| D10-EB2               | Y                                           | N                             | Y                    | S                                             |
| D10-EB3               | Y                                           | N                             | Y                    | S                                             |
| D11-EB1               | Y                                           | Y                             | Y                    | S                                             |
| D11-EB2               | Y                                           | Y                             | Y                    | S                                             |
| D11-EB3               | Y                                           | Y                             | Y                    | DC and S                                      |
| D13-EB1               | Y                                           | N                             | Y                    | DC and S                                      |
| D13-EB2               | Y                                           | N                             | Y                    | DC and S                                      |
| D13-EB3               | Y                                           | N                             | Y                    | DC and S                                      |
| D14-EB1               | Y                                           | Y                             | Y                    | S                                             |
| D14-EB2               | Y                                           | N                             | Y                    | S                                             |
| D14-EB3               | Y                                           | Y                             | Y                    | DC and S                                      |

**Supplementary Table 2.** Table summarizes the visual cell viability assessment of EBs at different days of growth.

N = None; Y= Yes; S= Scattered; DC= Dense core

# Supplementary Table 3

| EBs at different days | Shape of EB | Inner EB cavities                                | Outer EB cavities                 |
|-----------------------|-------------|--------------------------------------------------|-----------------------------------|
| D07-EB1               | Spherical   | 1 (surrounding dead cell core)                   | 0                                 |
| D07-EB2               | Ellipsoidal | 0                                                | 0                                 |
| D07-EB3               | Spherical   | 0                                                | 0                                 |
| D10-EB1               | Spherical   | 1 central cavity                                 | 0                                 |
| D10-EB2               | Spherical   | 1                                                | 0                                 |
| D10-EB3               | Spherical   | 1                                                | 0                                 |
| D11-EB1               | Spherical   | 0                                                | 0                                 |
| D11-EB2               | Ellipsoidal | 1 central cavity                                 | 0                                 |
| D11-EB3               | Spherical   | 0                                                | 0                                 |
| D13-EB1               | Ellipsoidal | 0                                                | 1 starting to appear              |
| D13-EB2               | Ellipsoidal | 2 (2 surrounding dead cell core)                 | 3 (connected to each other)       |
| D13-EB3               | Ellipsoidal | 1 (appearing from one end of the dead cell core) | 1 starting to appear              |
| D14-EB1               | Irregular   | 1 central cavity                                 | 1 (connected to the inner cavity) |
| D14-EB2               | Ellipsoidal | 1 central cavity                                 | 4 (connected to the inner cavity) |
| D14-EB3               | Spherical   | 1 central cavity                                 | 1 (Connected to the inner cavity) |

**Supplementary Table 3.** Table summarizes the visual morphological assessment of EBs at different days of growth.

# Supplementary Table 4



| Chromosome spread number | 2D iPSC | 3D iPSC EB, day 8 | 3D iPSC EB, day 10 | 3D iPSC EB, day 11 | 3D iPSC EB, day 14 |
|--------------------------|---------|-------------------|--------------------|--------------------|--------------------|
| 1                        | 46,XY   | 46,XY             | 46,XY              | 46,XY              | 46, XY             |
| 2                        | 46,XY   | 46,XY             | 46,XY              | 45,XY,-10          | 43XY,-19,-20,-21   |
| 3                        | 46,XY   | 46,XY             | 46,XY              | 46,XY              | 45XY,-7            |
| 4                        | 46,XY   | 46,XY             | 46,XY              | 46,XY              | 46, XY             |
| 5                        | 46,XY   | 46,XY             | 46,XY              | 45,XY,-17          | 46, XY             |
| 6                        | 46,XY   | 46,XY             | 46,XY              | 46,XY              | 46, XY             |
| 7                        | 46,XY   | 46,XY             | 46,XY              | 46,XY              | 44X,-21 -Y         |
| 8                        | 46,XY   | 46,XY             | 45,XY, -9          | 46,XY              | 44XY,-17,-22       |
| 9                        | 46,XY   | 46,XY             |                    |                    | 46, XY             |
| 10                       | 46,XY   | 46,XY             |                    |                    | 46, XY             |
| 11                       | 46,XY   | 46,XY             |                    |                    | 46, XY             |
| 12                       | 46,XY   | 46,XY             |                    |                    | 46, XY             |
| 13                       | 46,XY   | 46,XY             |                    |                    | 46, XY             |
| 14                       | 46,XY   | 46,XY             |                    |                    |                    |
| 15                       | 46,XY   | 46,XY             |                    |                    |                    |

**Supplementary Table 4.** Table summarizes the karyotypic findings from the iPSCs (2D) and derived EBs (3D) at different days of growth using M-FISH.

# Supplementary Table 5

| Chromosome spread number | 2D iPSC | 3D iPSC EB, day 8 | 3D iPSC EB, day 10 | 3D iPSC EB, day 11 | 3D iPSC EB, day 14 |
|--------------------------|---------|-------------------|--------------------|--------------------|--------------------|
| 1                        | 46,XY   | 46,XY             | 46,XY              | 46,XY              | 46,XY              |
| 2                        | 46,XY   | 46,XY             | 46,XY              | 46,XY              | 46,XY              |
| 3                        | 46,XY   | 46,XY             | 46,XY              | 46,XY              | 46,XY              |
| 4                        | 46,XY   | 46,XY             | 46,XY              | 46,XY              | 46,XY              |
| 5                        | 46,XY   | 46,XY             | 46,XY              | 46,XY              | 46,XY              |
| 6                        | 46,XY   | 46,XY             | 46,XY              | 46,XY              | 45,XY              |
| 7                        | 46,XY   | 46,XY             | 46,XY              | 46,XY              | 46,XY              |
| 8                        | 46,XY   | 46,XY             | 46,XY              | 46,XY              | 46,XY              |
| 9                        | 46,XY   | 46,XY             | 46,XY              | 46,XY              | 43,XY              |
| 10                       | 46,XY   | 46,XY             | 46,XY              | 46,XY              | 44,XY              |
| 11                       | 46,XY   | 46,XY             | 46,XY              | 46,XY              | 46,XY              |
| 12                       | 46,XY   | 46,XY             | 46,XY              | 46,XY              | 44,XY              |
| 13                       | 46,XY   | 46,XY             | 46,XY              | 46,XY              | 46,XY              |
| 14                       | 46,XY   | 46,XY             | 46,XY              | 46,XY              | 46,XY              |
| 15                       | 46,XY   | 46,XY             | 46,XY              | 46,XY              | 46,XY              |
| 16                       | 46,XY   | 46,XY             | 46,XY              | 46,XY              | 46,XY              |
| 17                       | 46,XY   | 46,XY             | 46,XY              | 46,XY              | 46,XY              |
| 18                       | 46,XY   | 46,XY             | 46,XY              | 45,XY              | 46,XY              |
| 19                       | 46,XY   | 46,XY             | 46,XY              | 46,XY              | 46,XY              |
| 20                       | 46,XY   | 46,XY             | 46,XY              | 44,XY              | 46,XY              |
| 21                       | 46,XY   | 46,XY             | 46,XY              | 46,XY              | 46,XY              |
| 22                       | 46,XY   | 46,XY             | 46,XY              | 46,XY              | 46,XY              |
| 23                       | 46,XY   | 46,XY             | 46,XY              | 45,XY              | 46,XY              |
| 14                       | 46,XY   | 46,XY             | 46,XY              | 46,XY              | 46,XY              |
| 15                       | 46,XY   | 46,XY             | 46,XY              | 45,XY              | 46,XY              |
| 16                       | 46,XY   | 46,XY             | 46,XY              | 46,XY              | 46,XY              |
| 27                       | 46,XY   | 46,XY             | 46,XY              | 45,XY              | 46,XY              |
| 28                       | 46,XY   | 46,XY             | 46,XY              | 46,XY              | 44,XY              |
| 29                       | 46,XY   | 46,XY             | 46,XY              | 46,XY              | 46,XY              |
| 30                       | 46,XY   | 46,XY             | 46,XY              | 46,XY              | 46,XY              |

**Supplementary Table 5.** Table summarizes the chromosomal count of iPSCs (2D) and derived EBs (3D) at different days of growth done on DAPI stained chromosome spreads.
